# Supplementary material for: Association Mapping and the Genomic Consequences of Selection in Sunflower
Source: PubMed Central journal article supplement (PMC3605098; doi:10.1371/journal.pgen.1003378), 2013-03-21

# Linkage Group 1

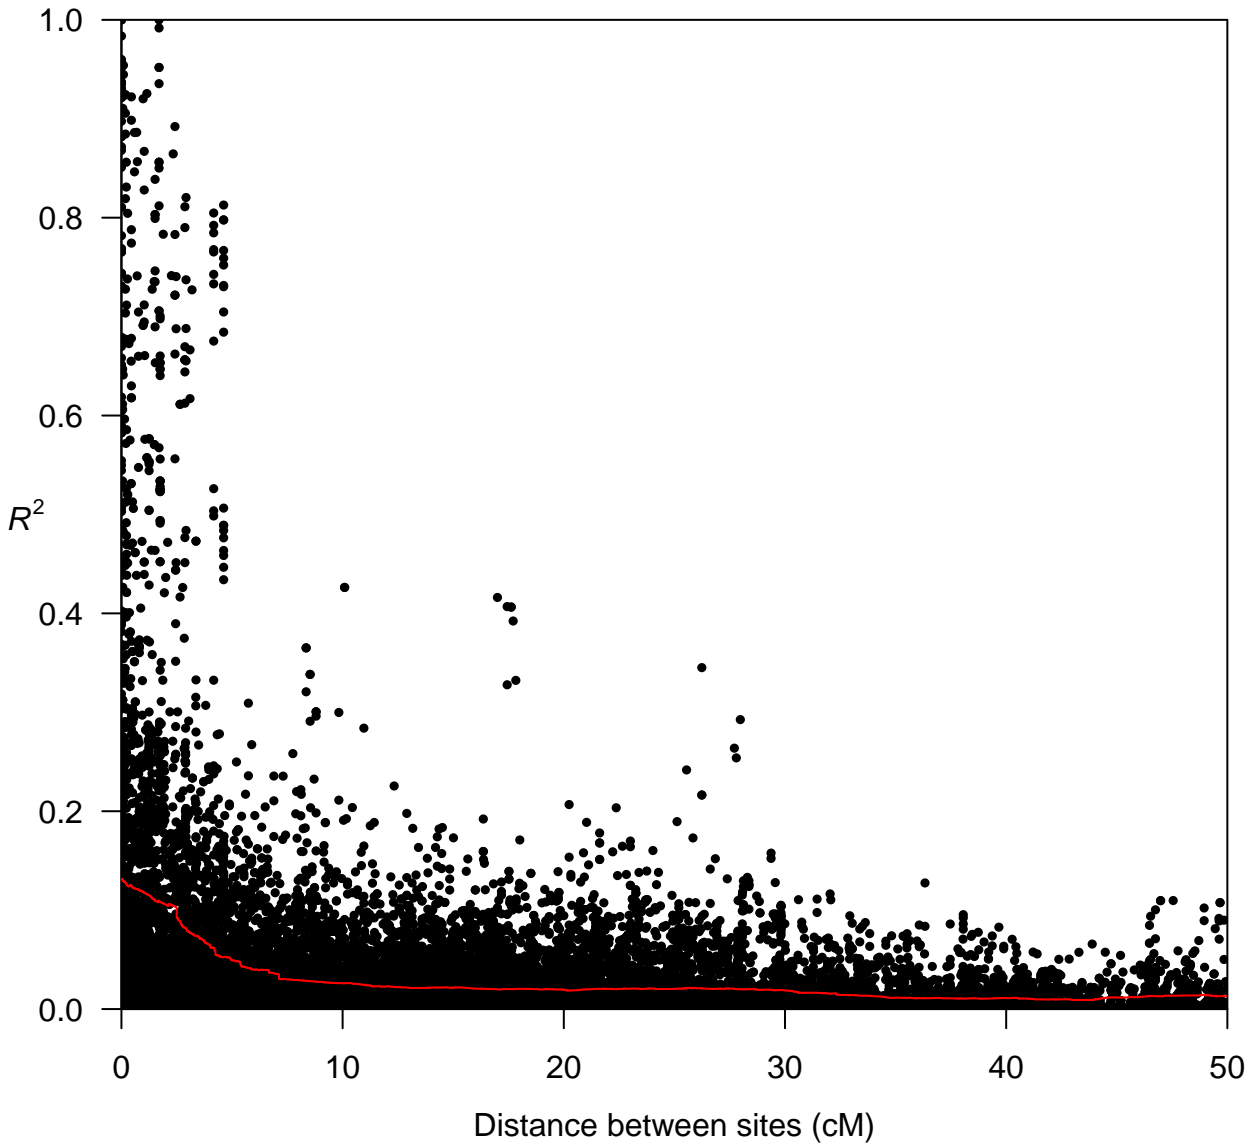

# Linkage Group 2

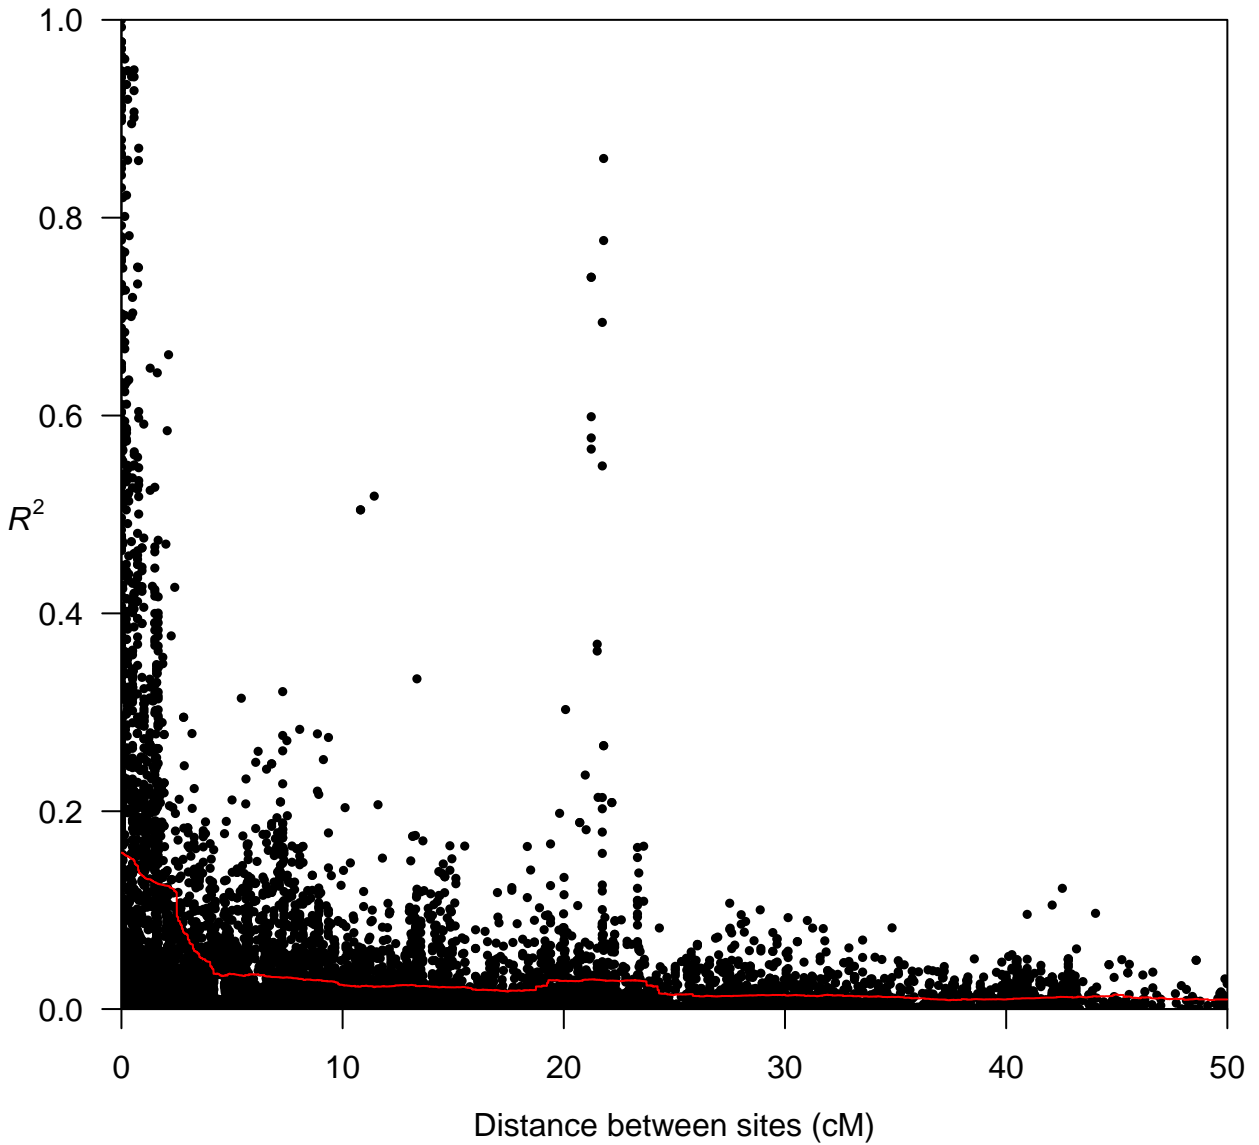

# Linkage Group 3

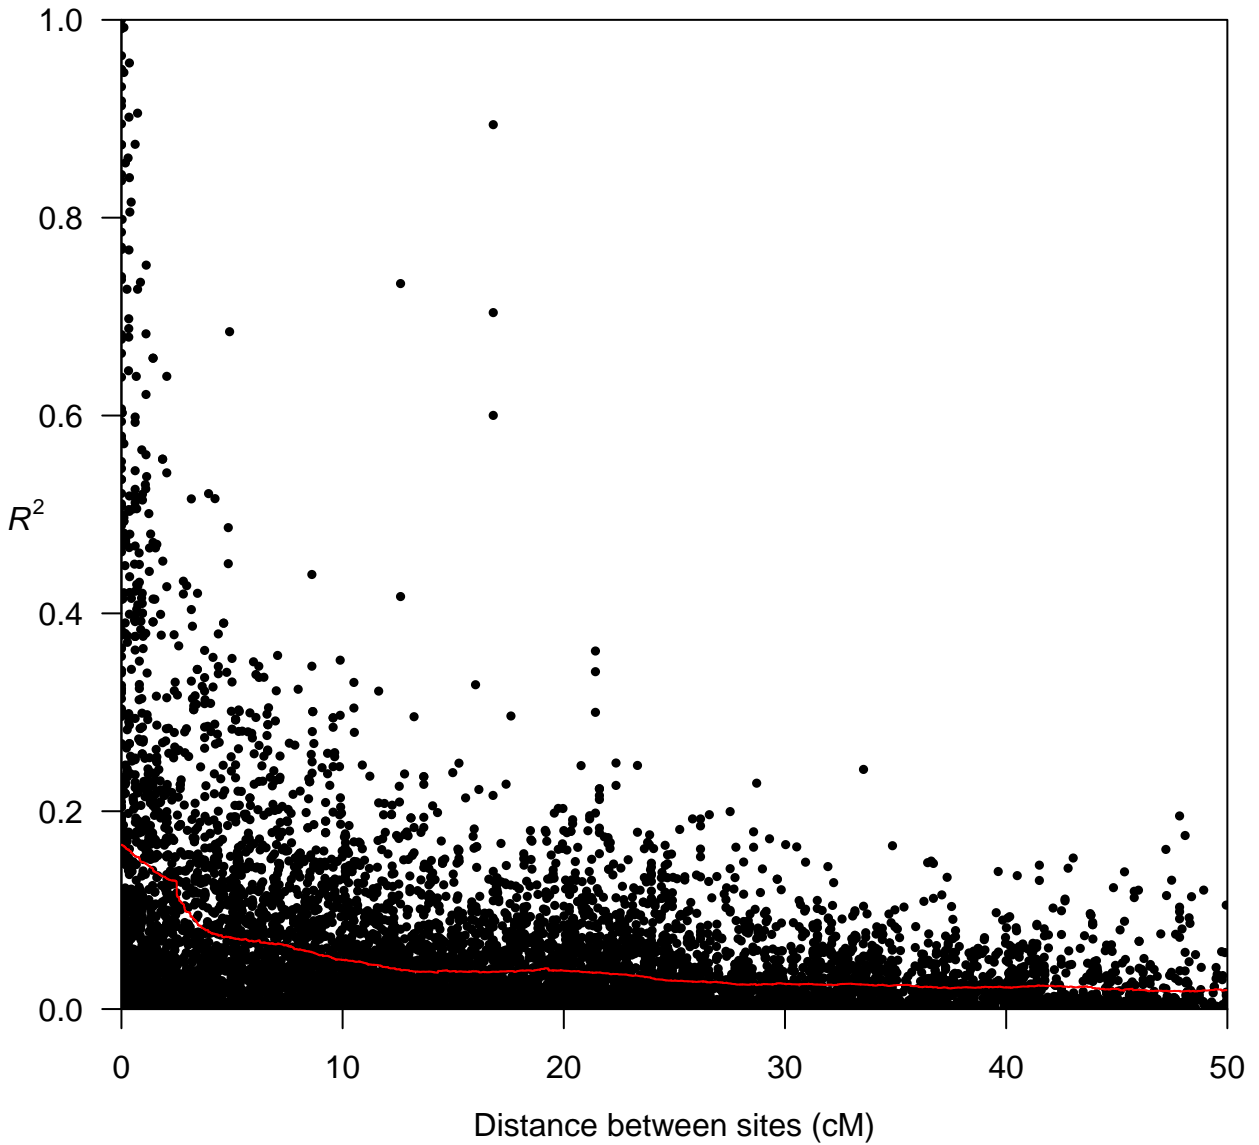

# Linkage Group 4

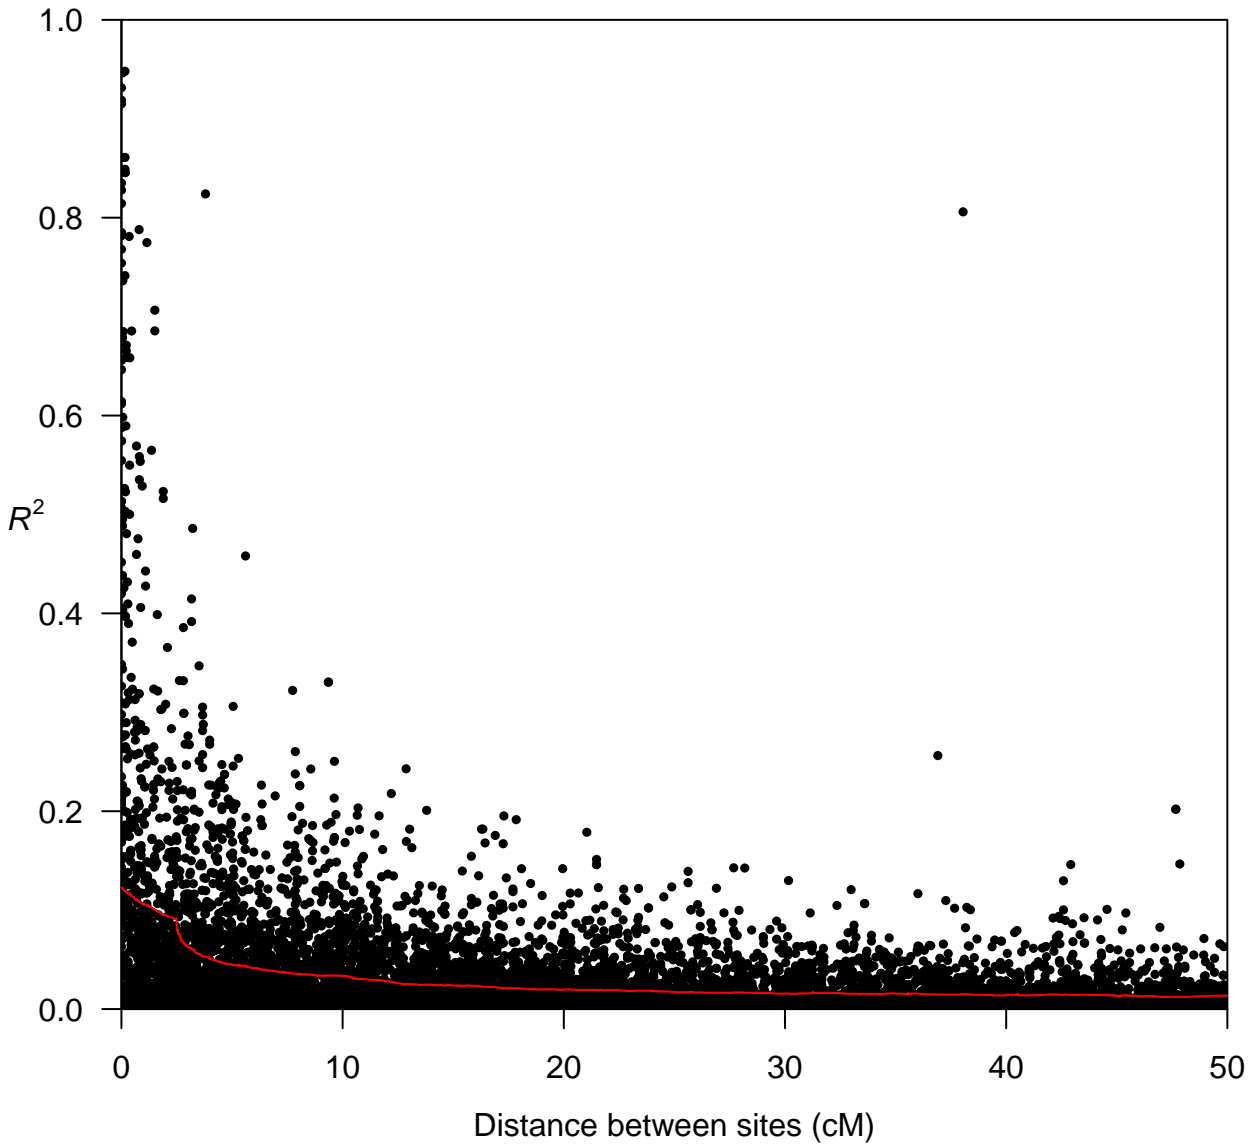

# Linkage Group 5

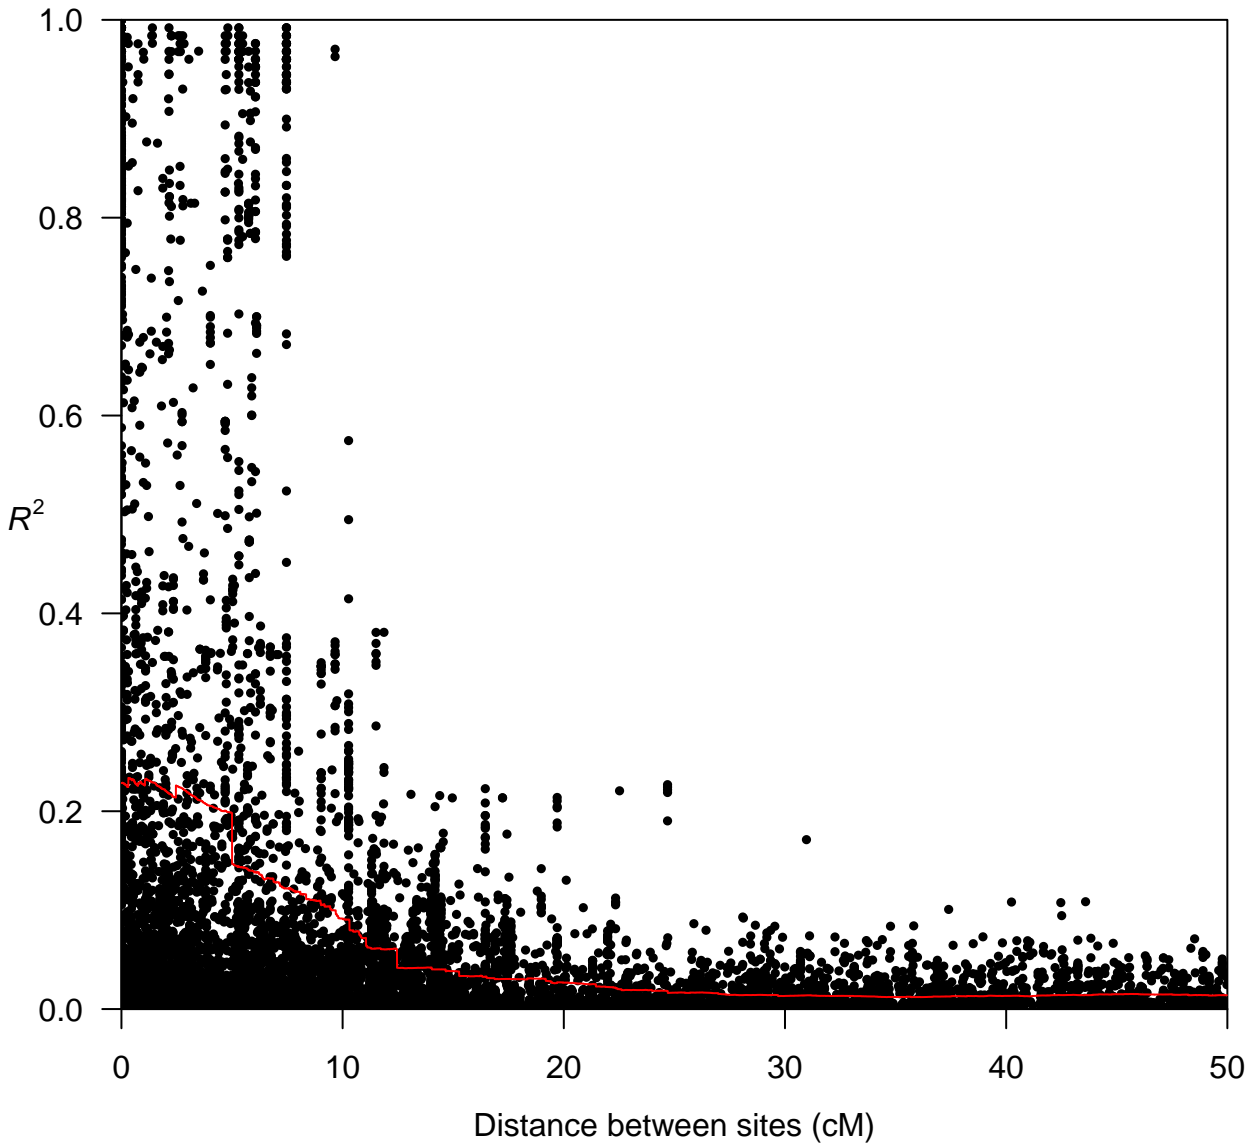

# Linkage Group 6

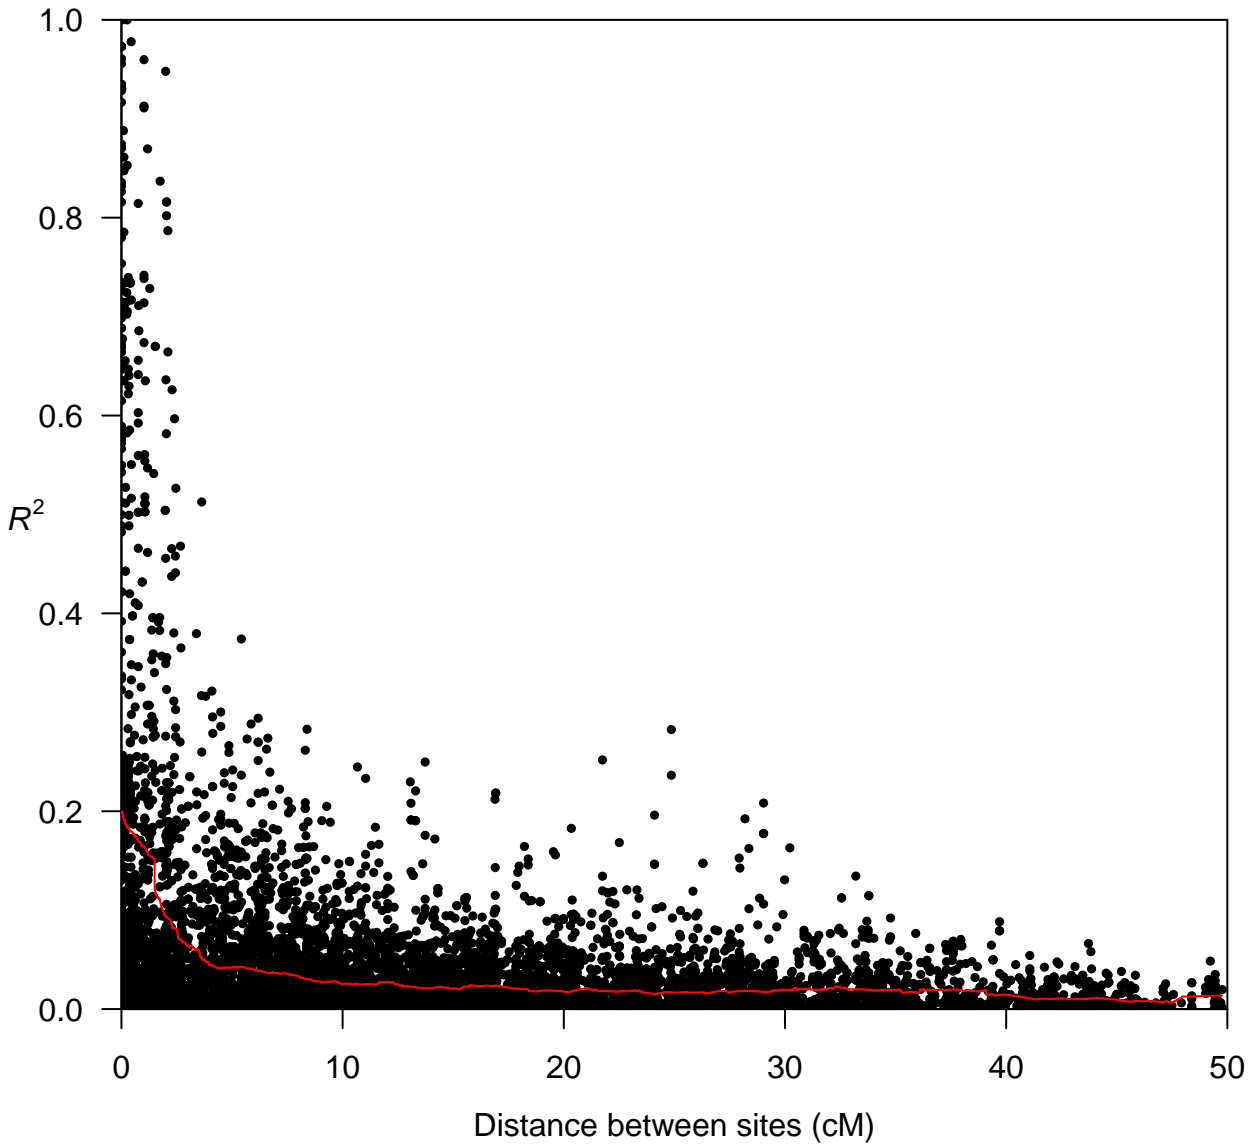

# Linkage Group 7

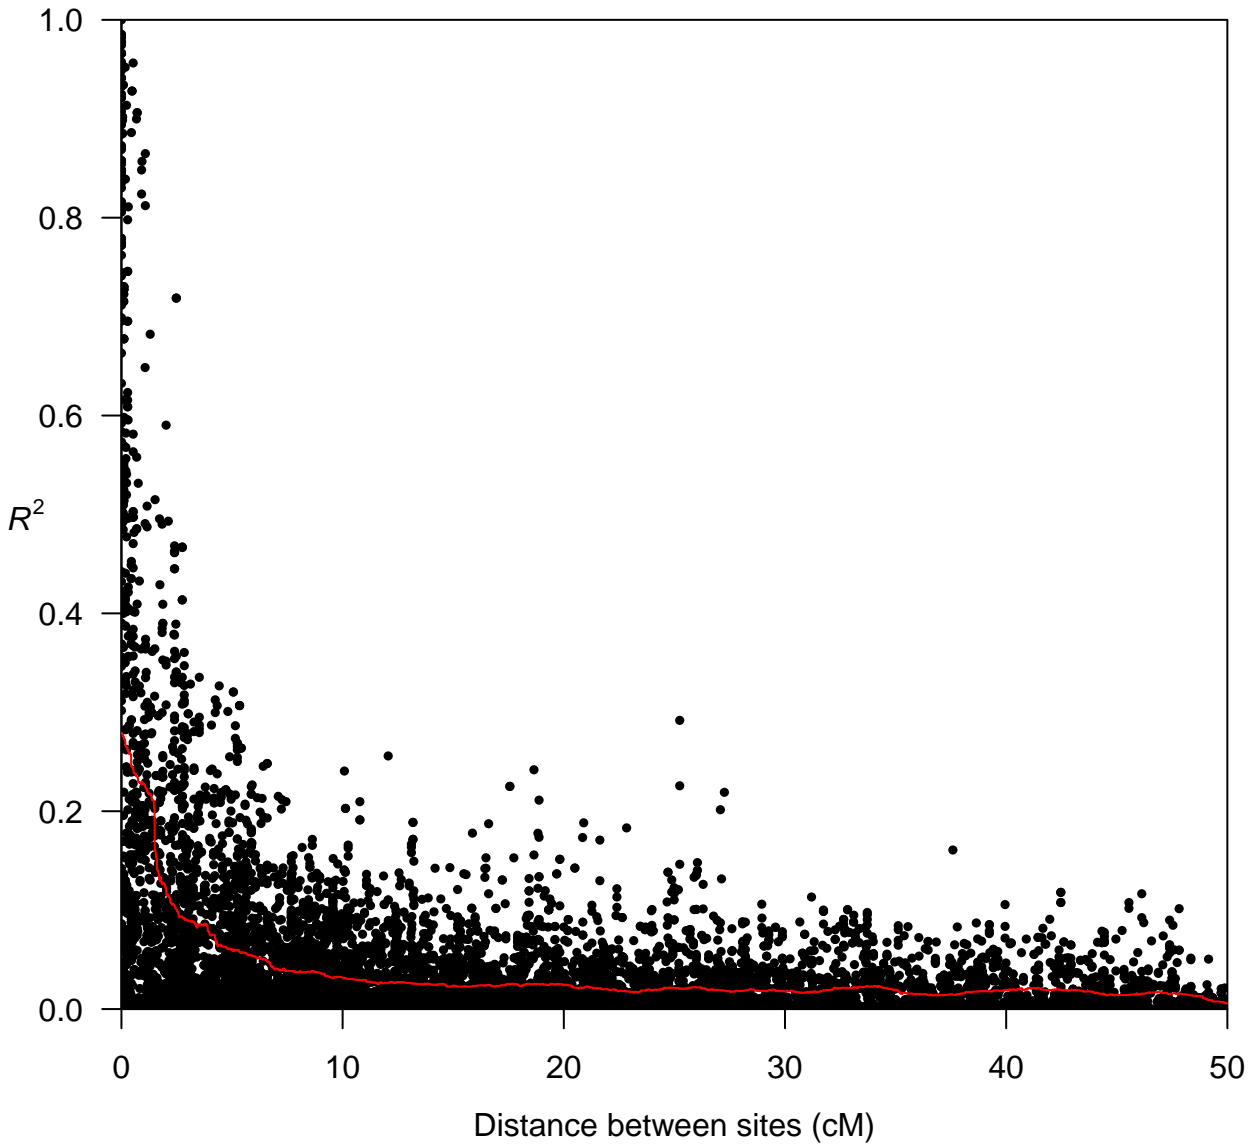

# Linkage Group 8

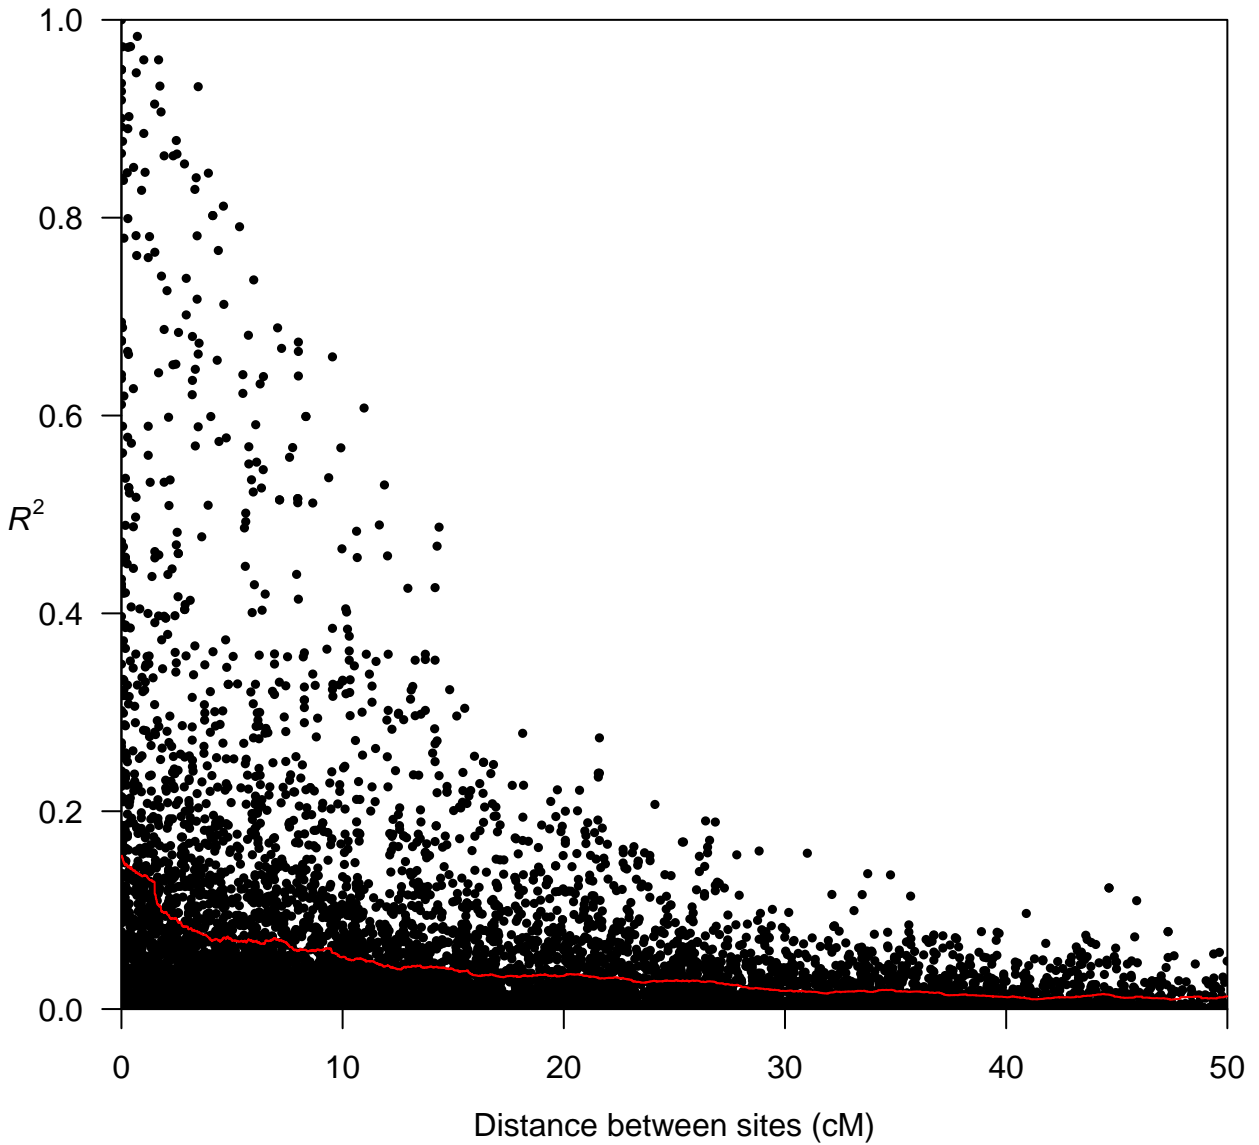



# Linkage Group 9

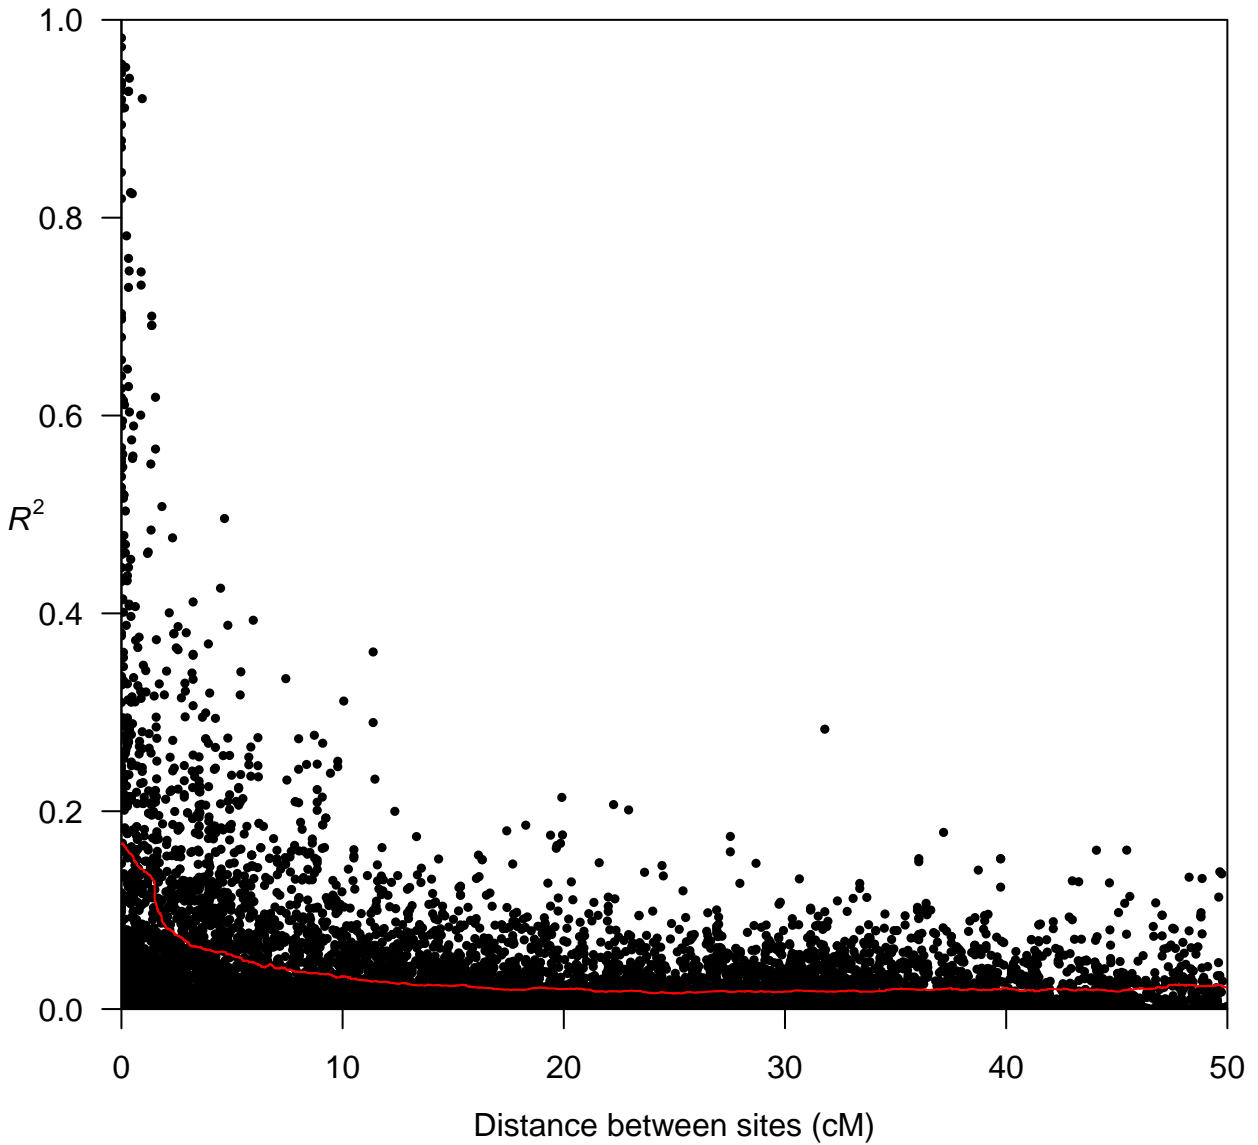

# Linkage Group 10

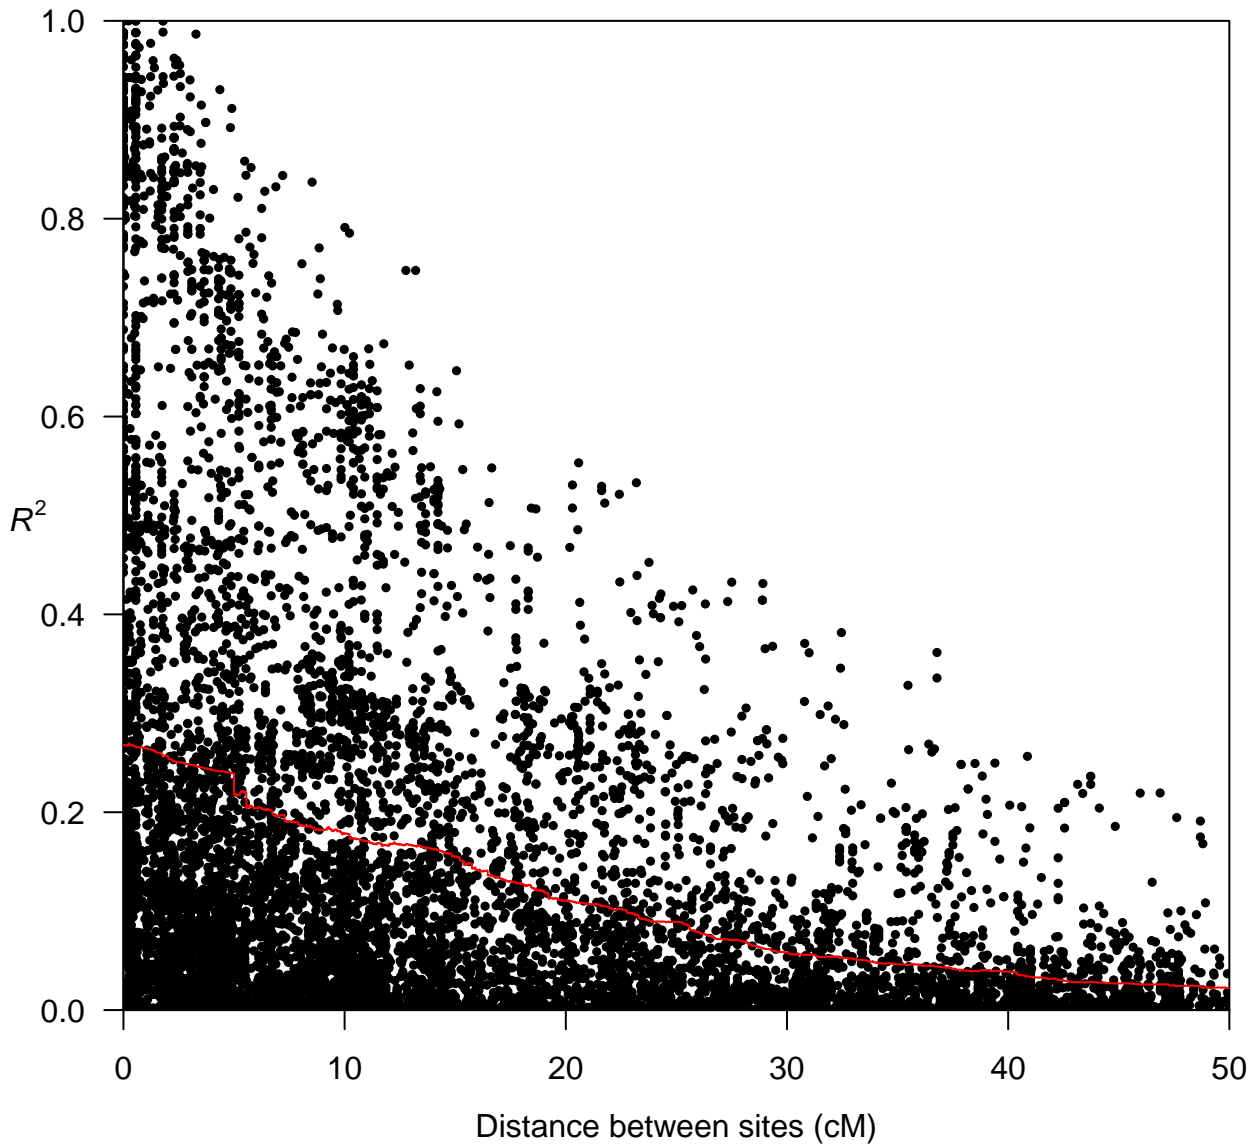

# Linkage Group 11

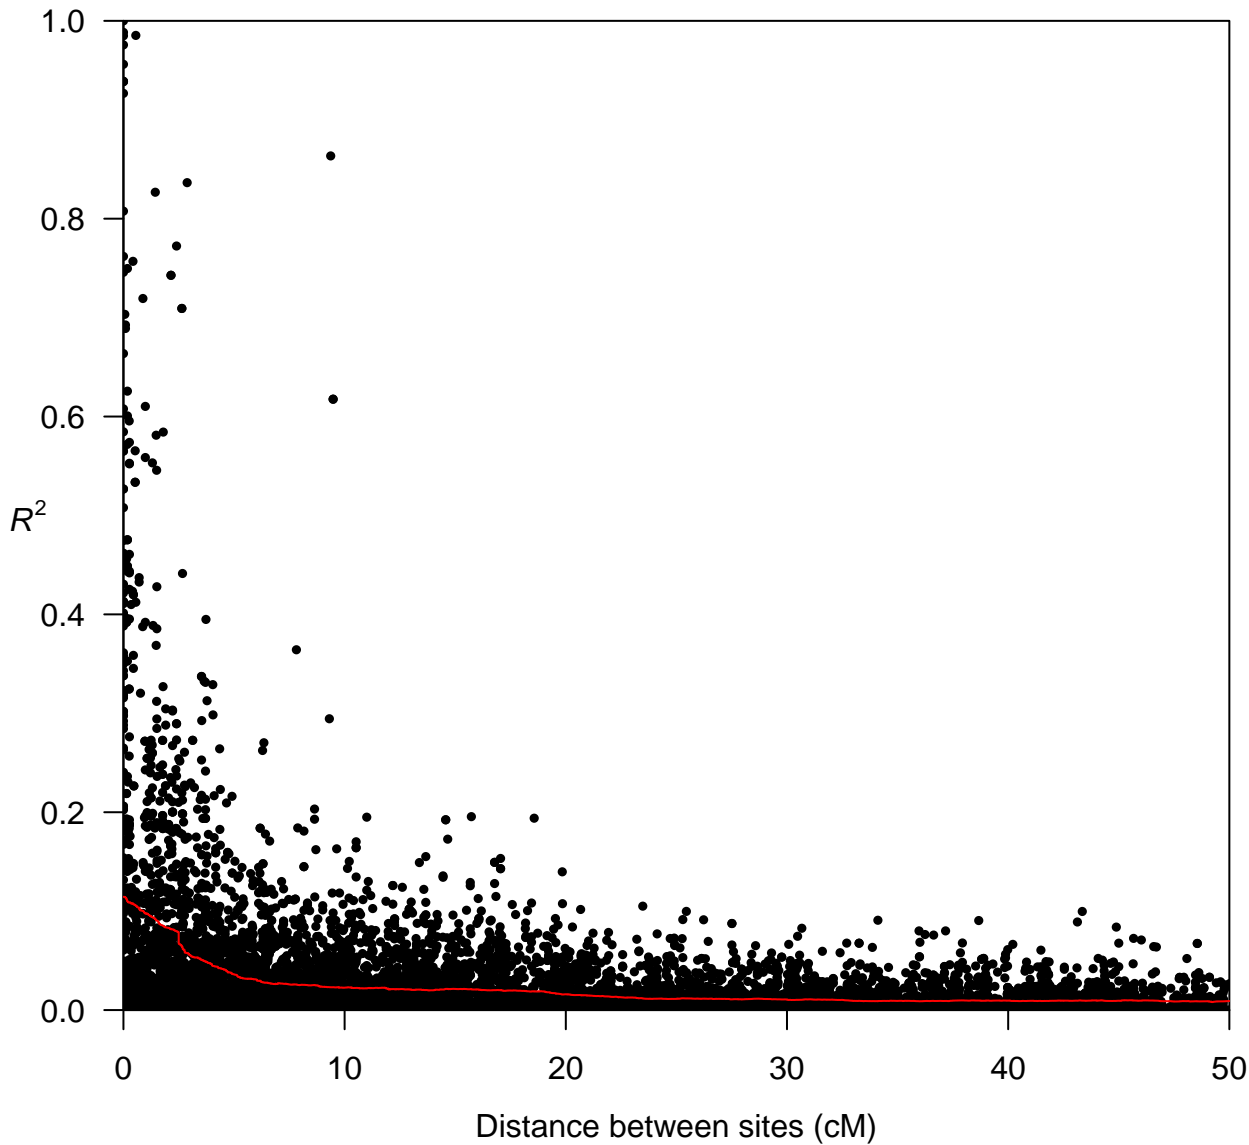

# Linkage Group 12

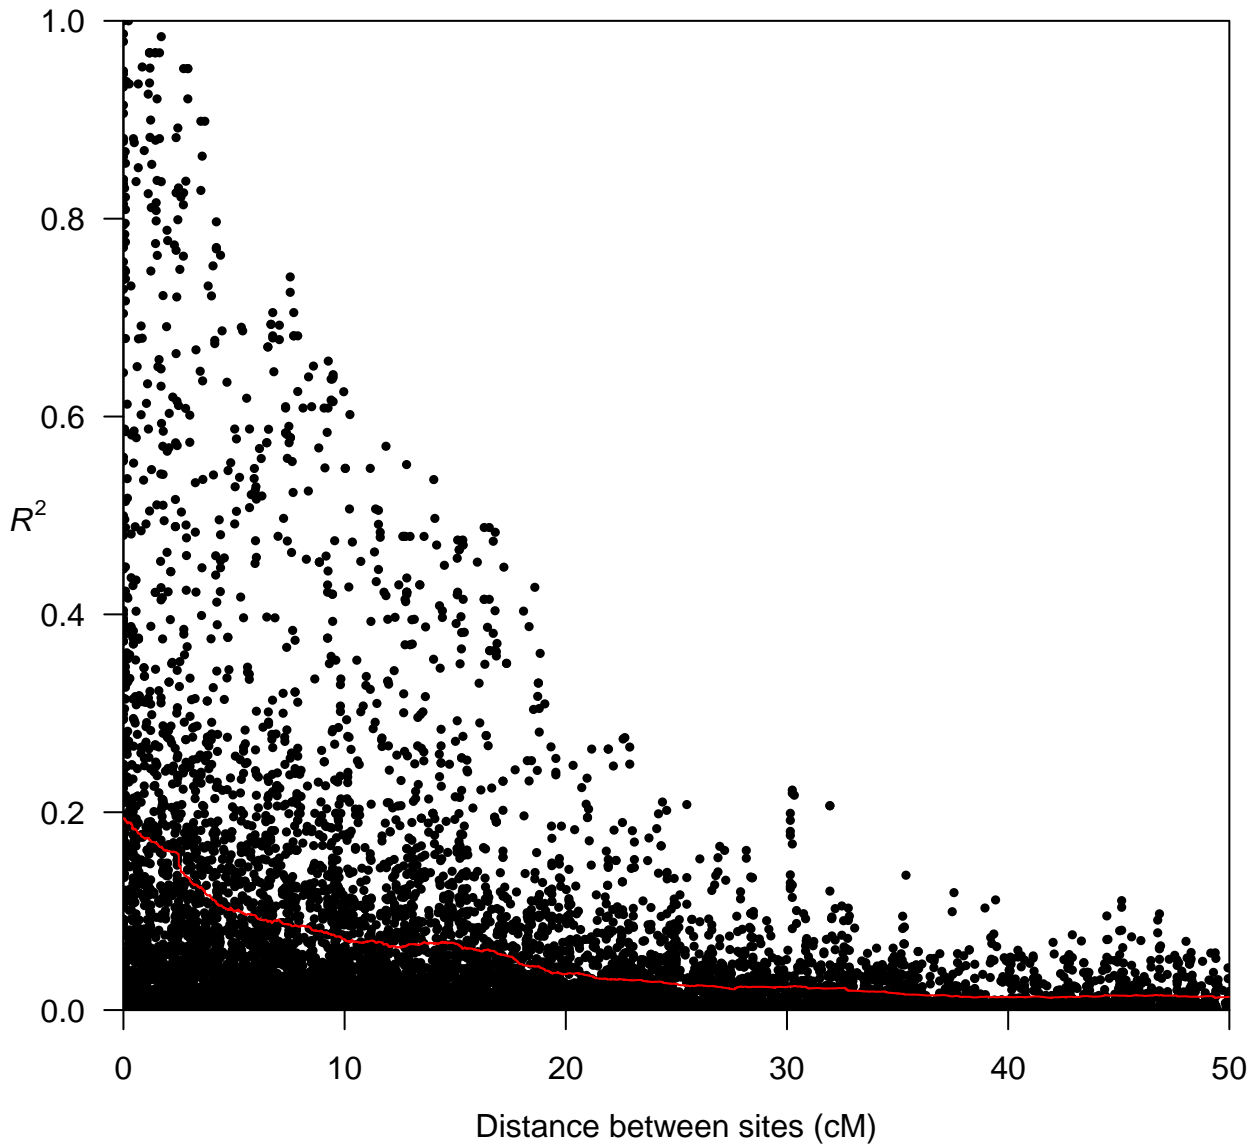

# Linkage Group 13

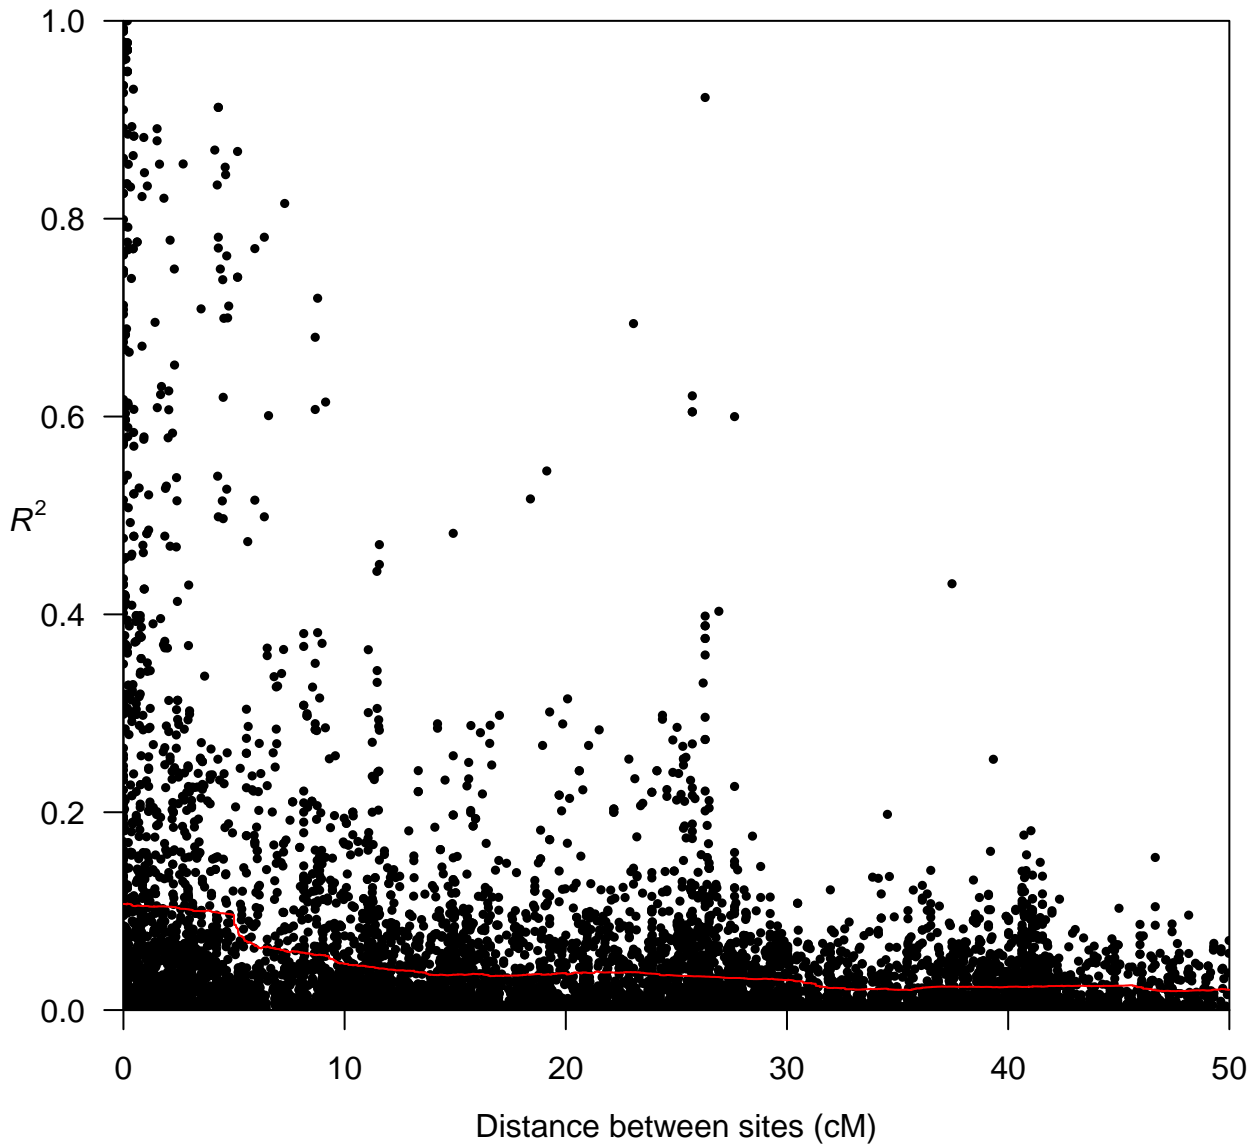

# Linkage Group 14

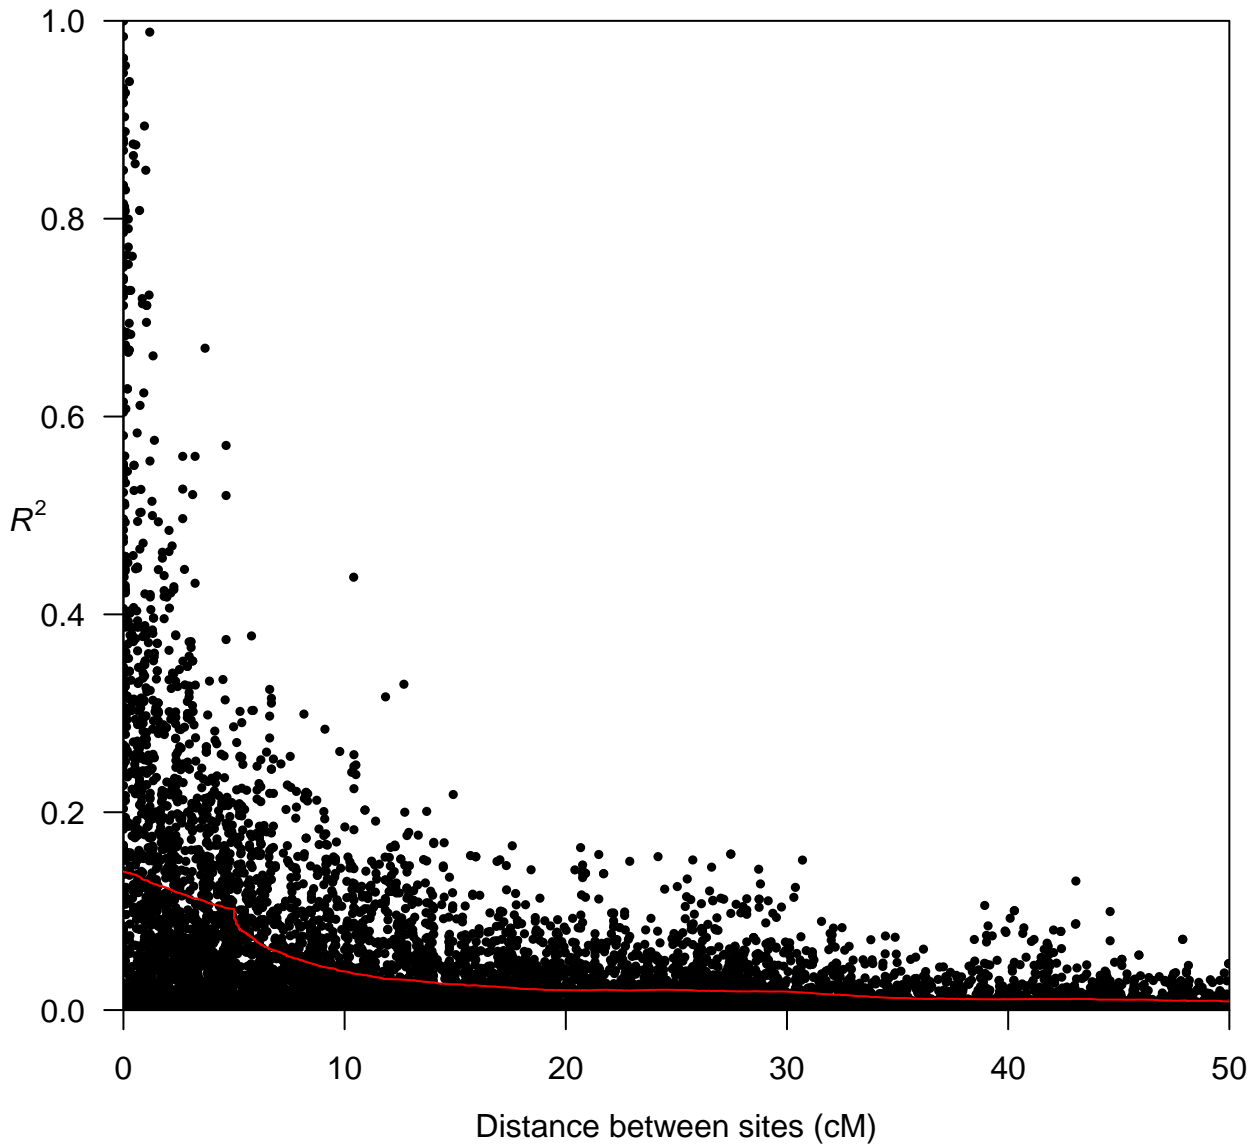

# Linkage Group 15

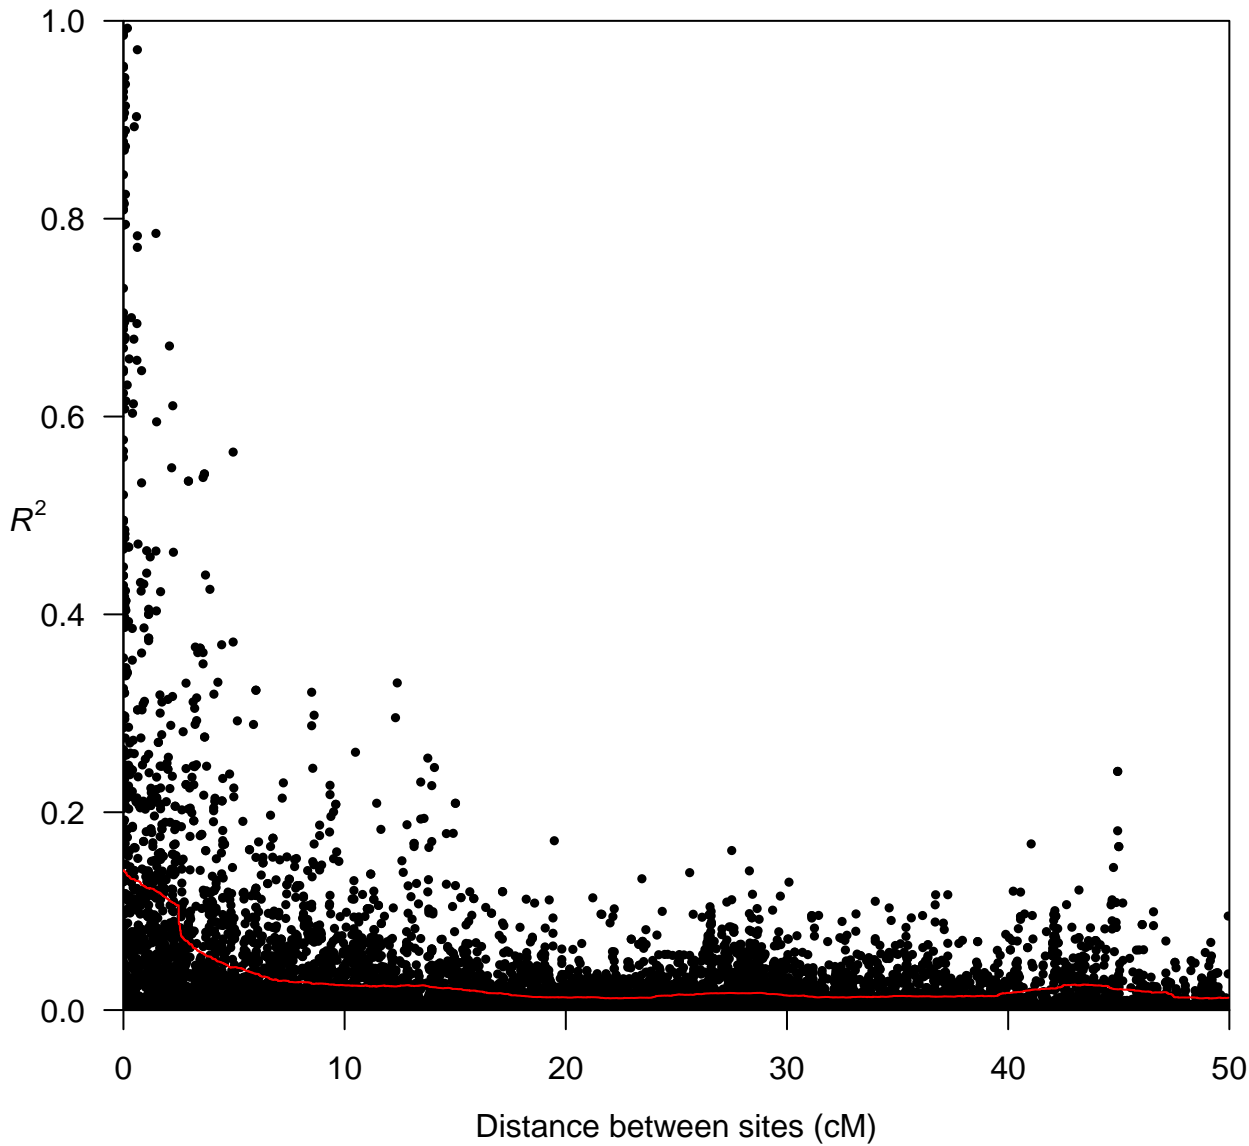

# Linkage Group 16

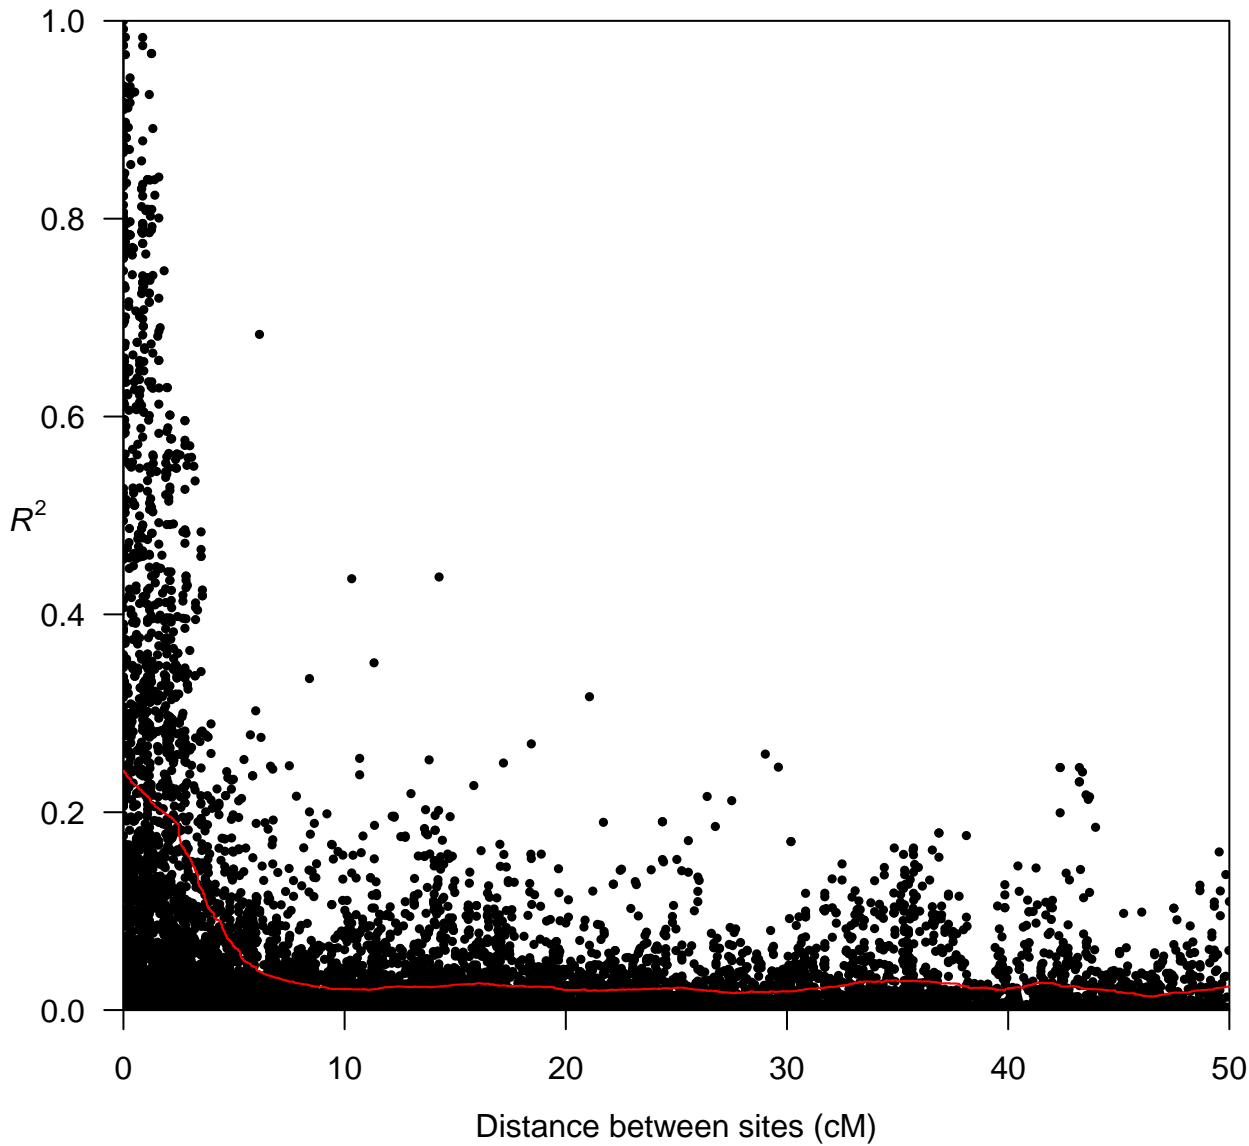



# Linkage Group 17

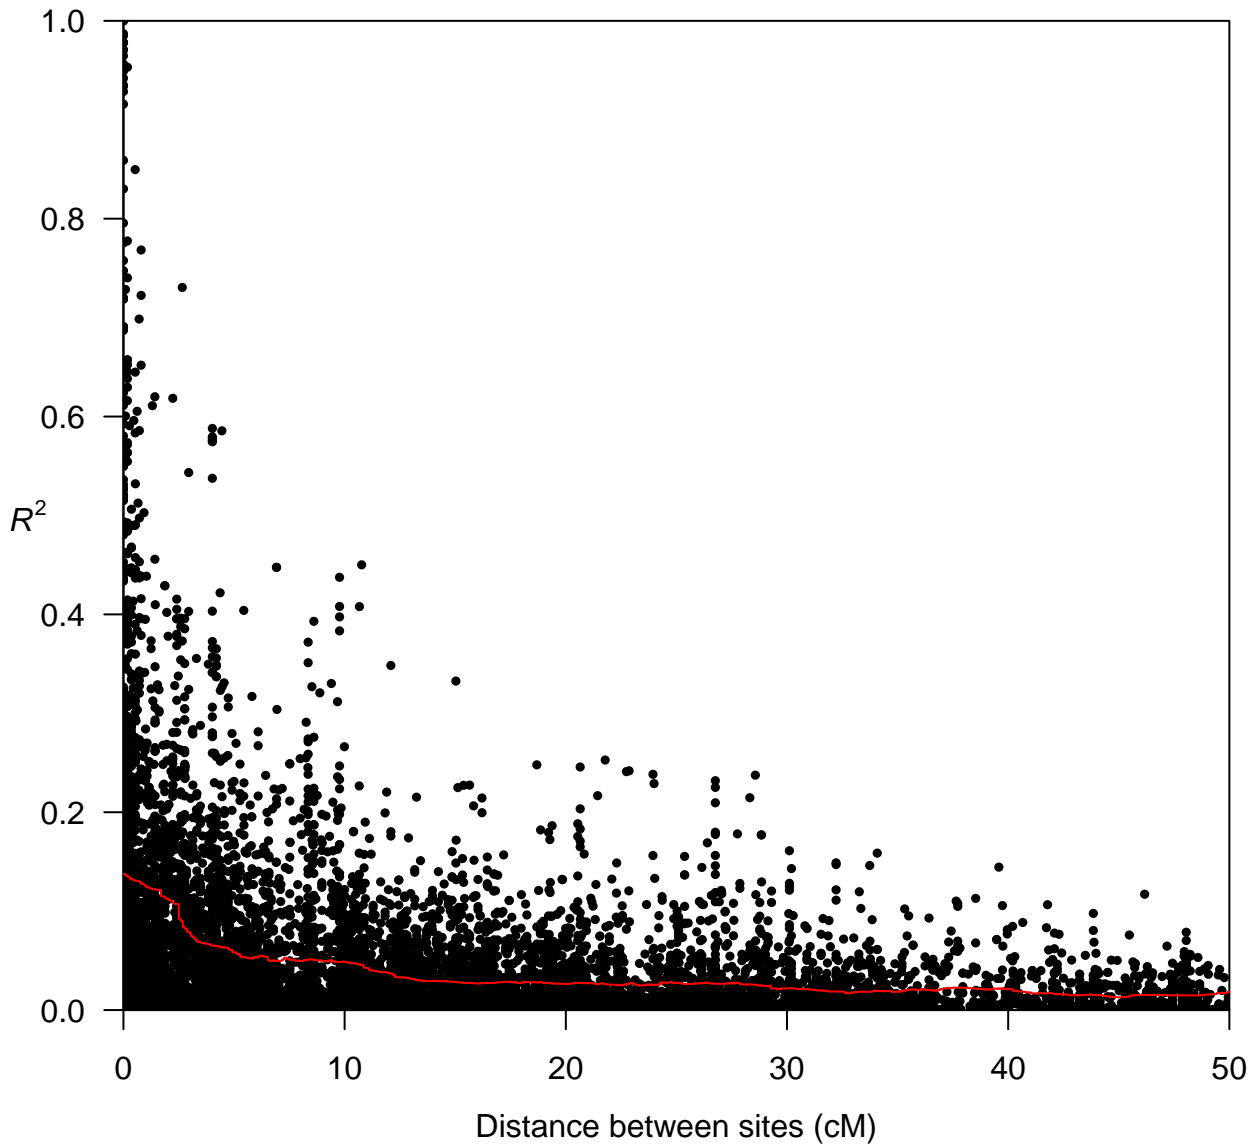

Supplement: pgen.1003378.s005.pdf [file pgen.1003378.s005.pdf]
