# Supplementary material for: Association Mapping and the Genomic Consequences of Selection in Sunflower
Source: PubMed Central journal article supplement (PMC3605098; doi:10.1371/journal.pgen.1003378), 2013-03-21

LG 1

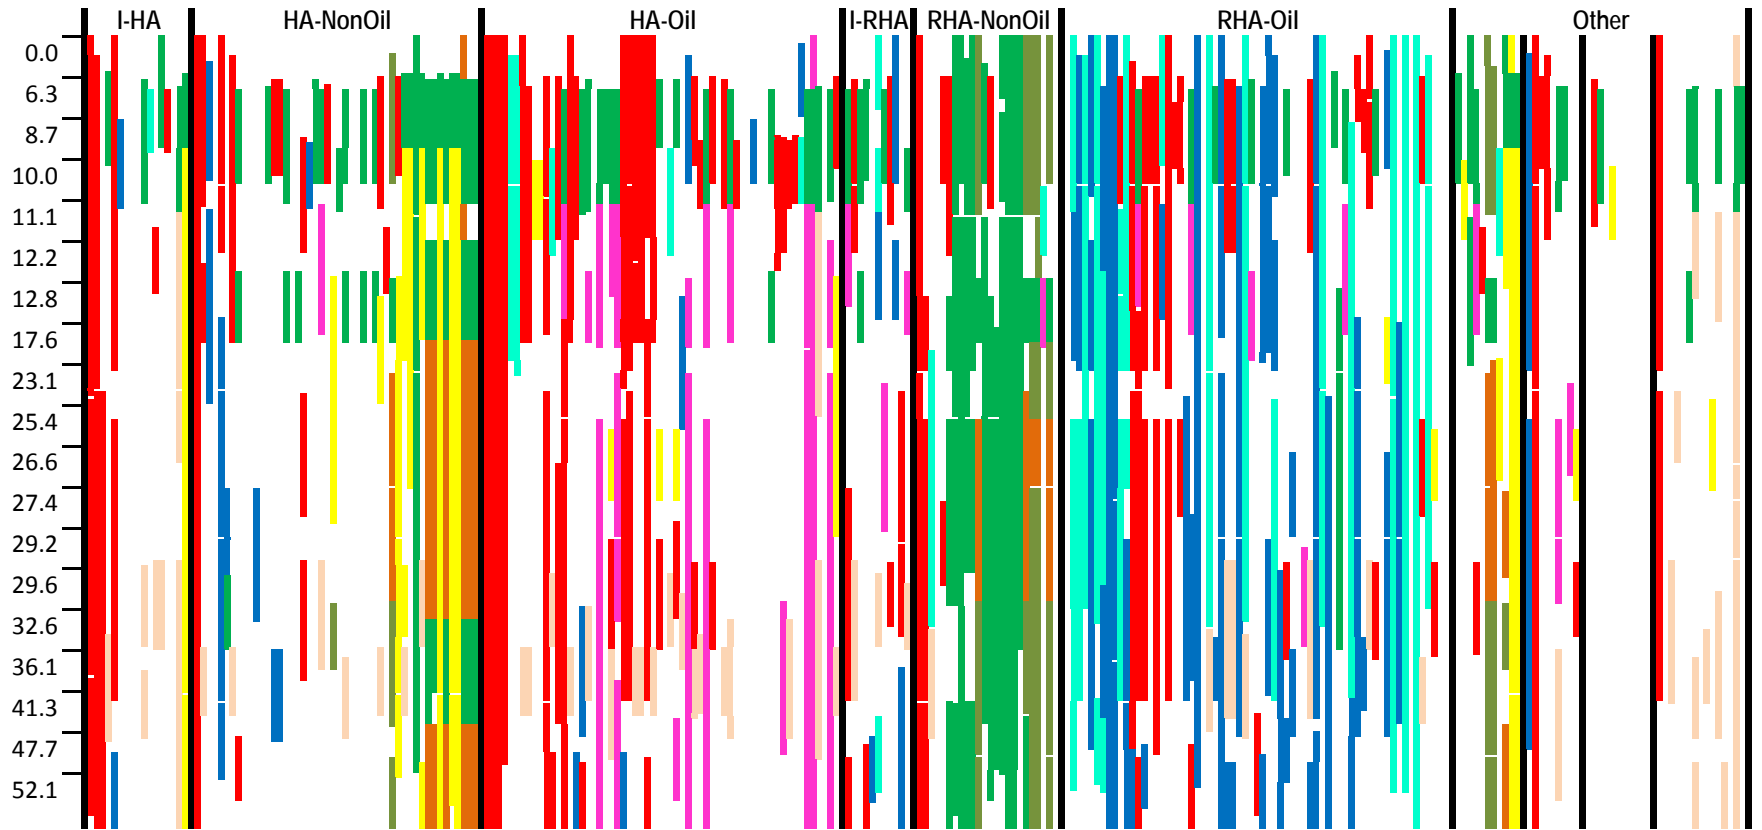

LG 2

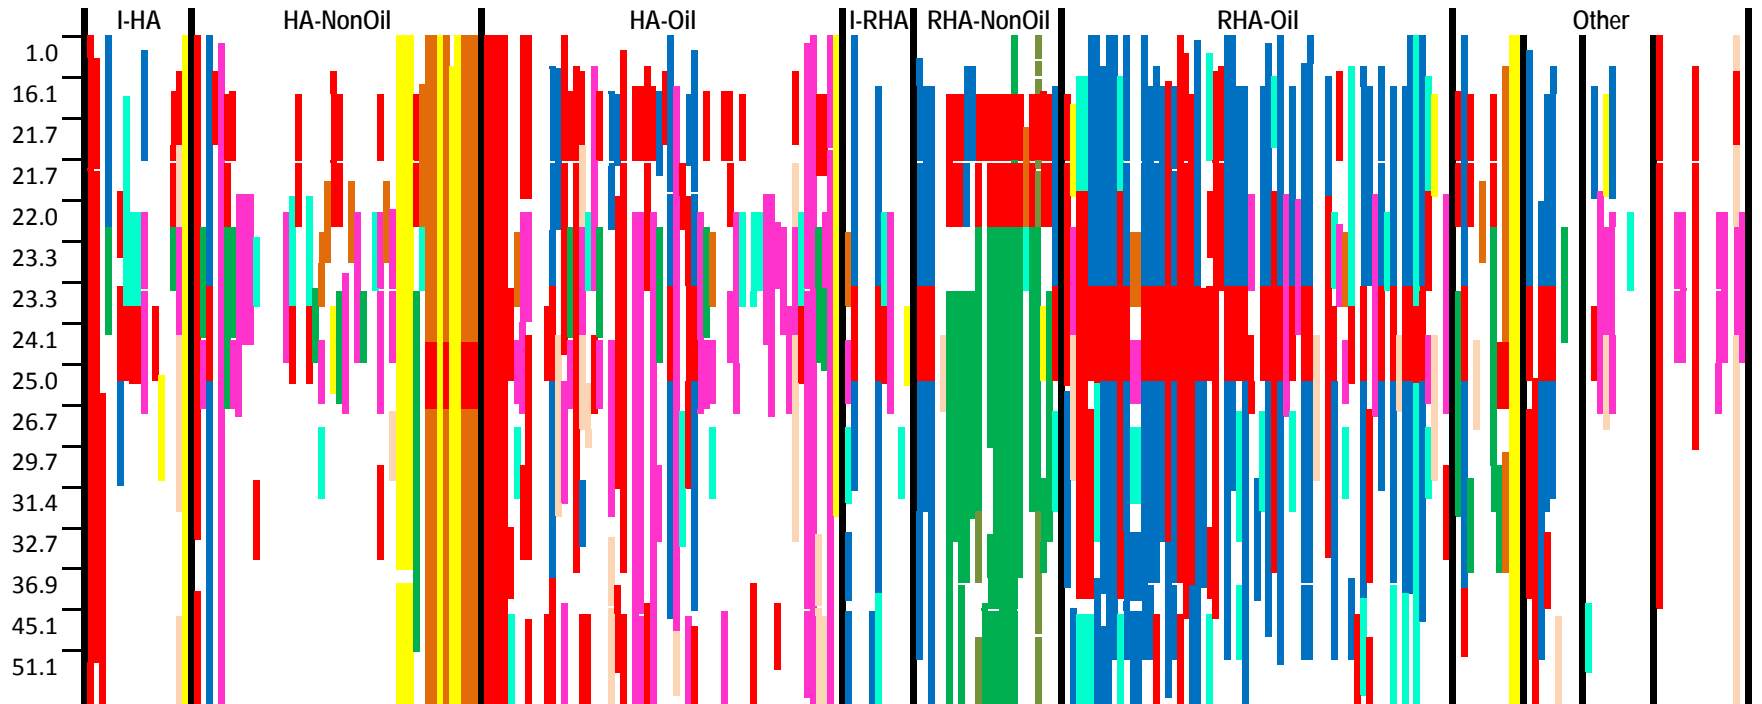

LG 3

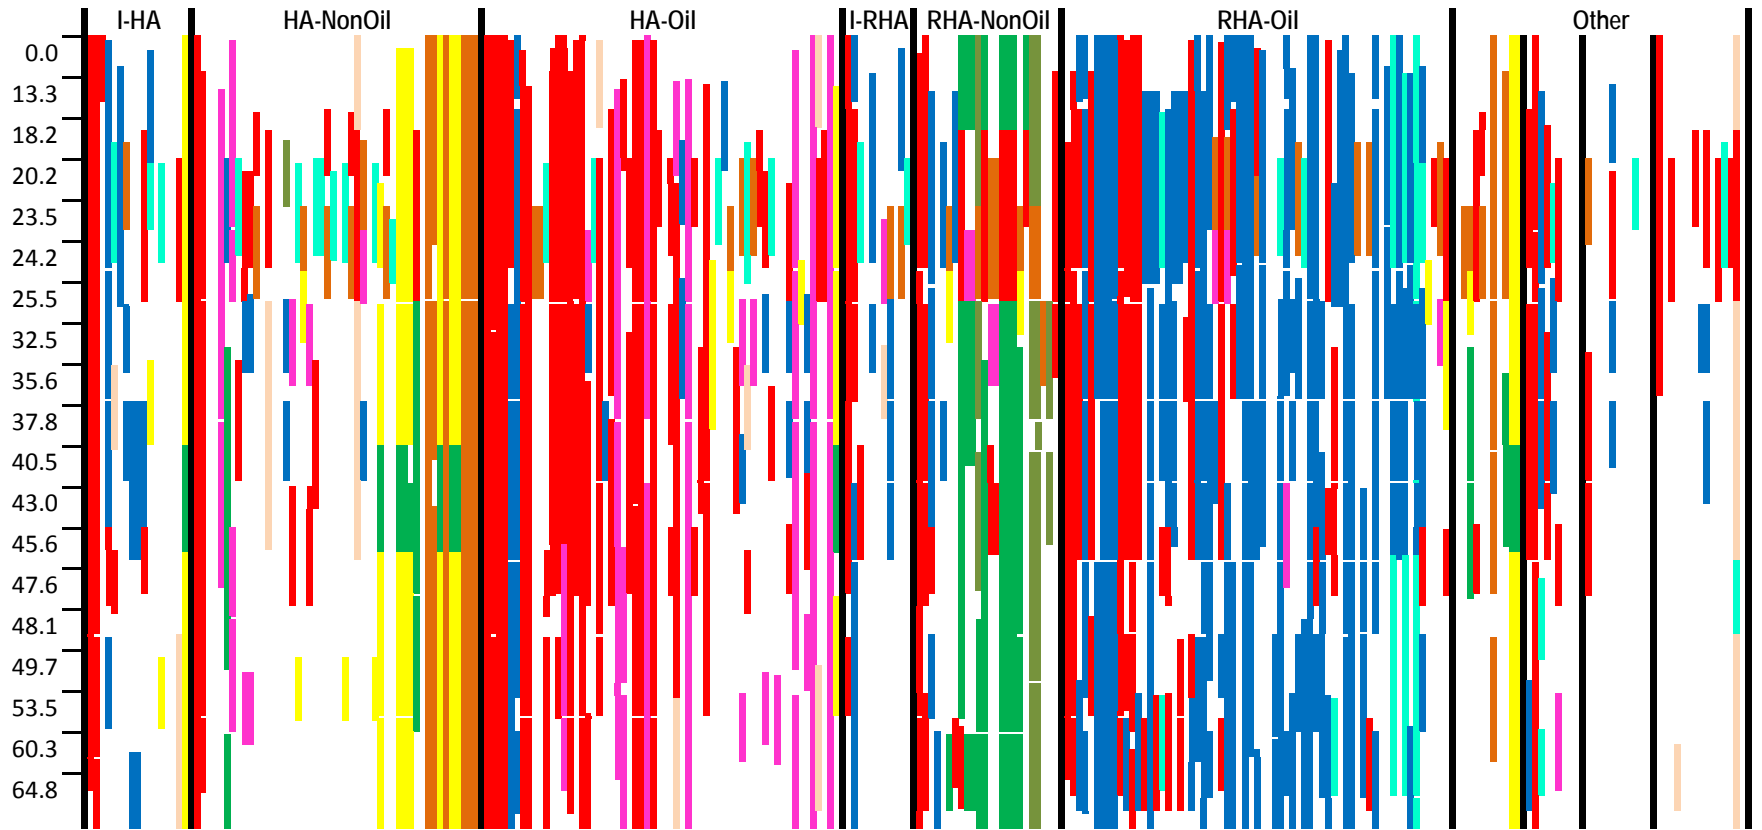

LG 4

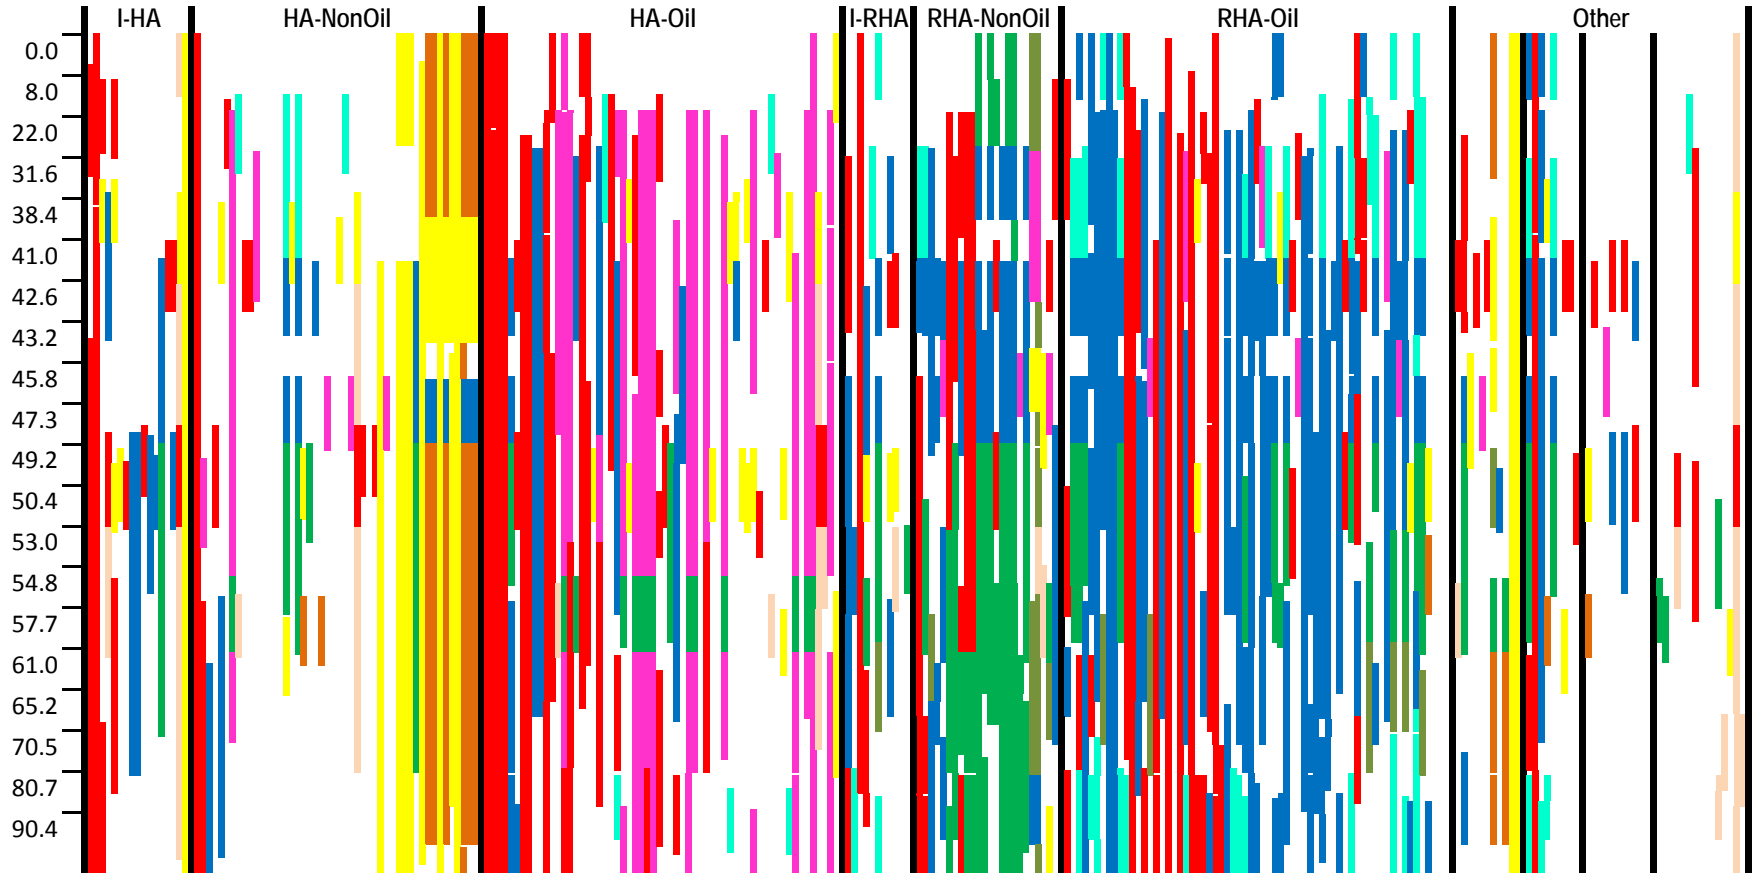

LG 5

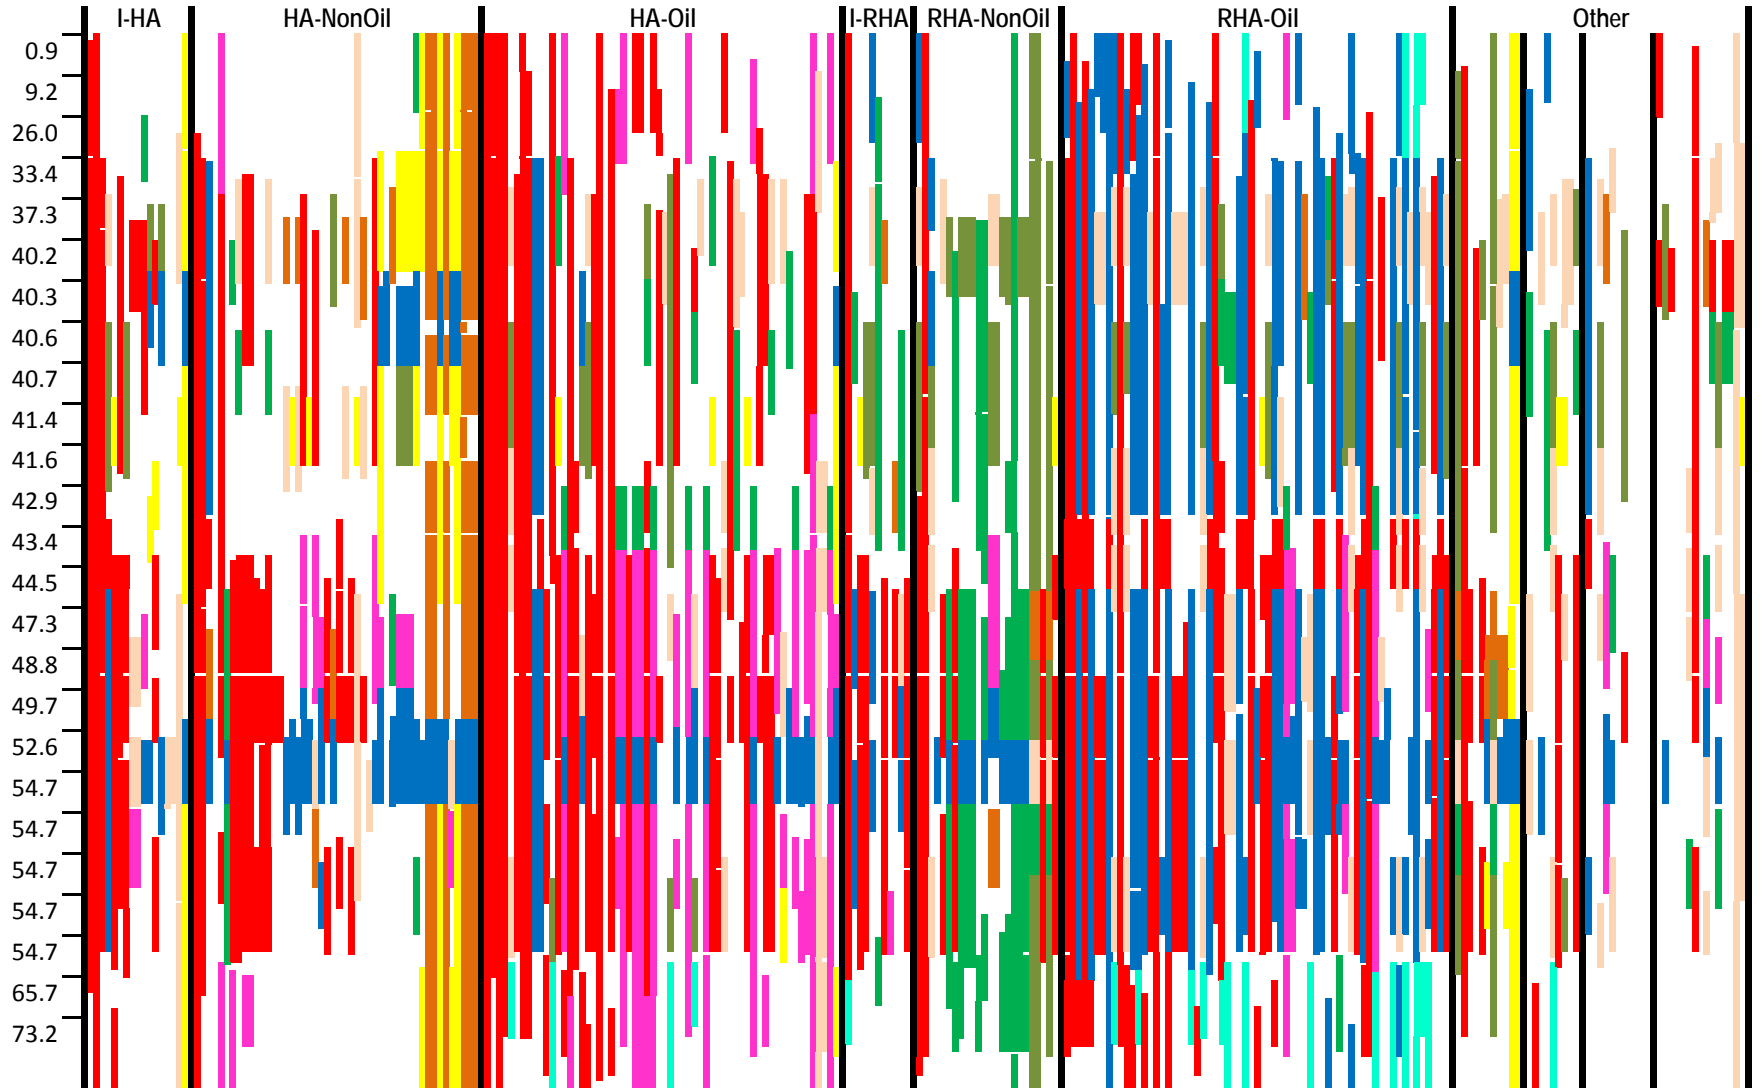

LG 6

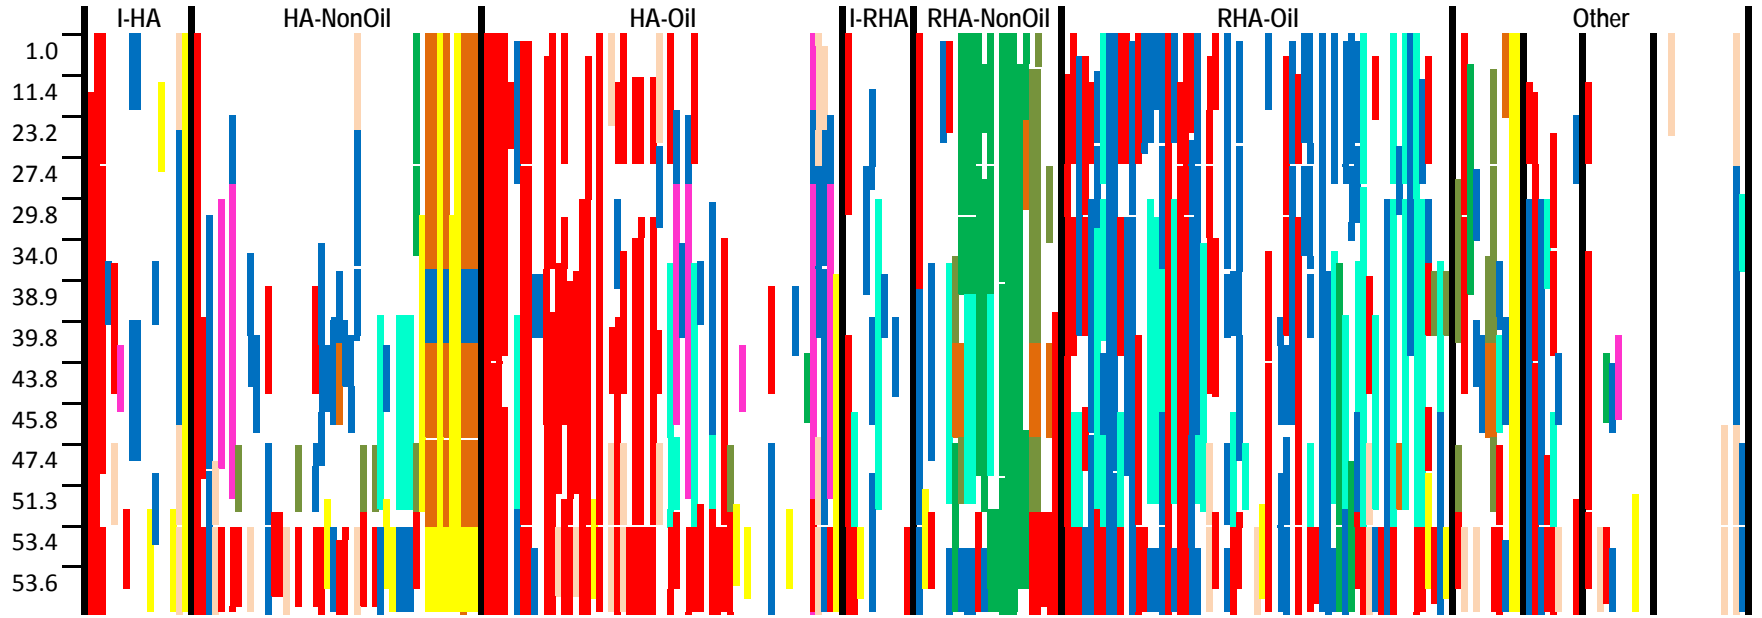

LG 7

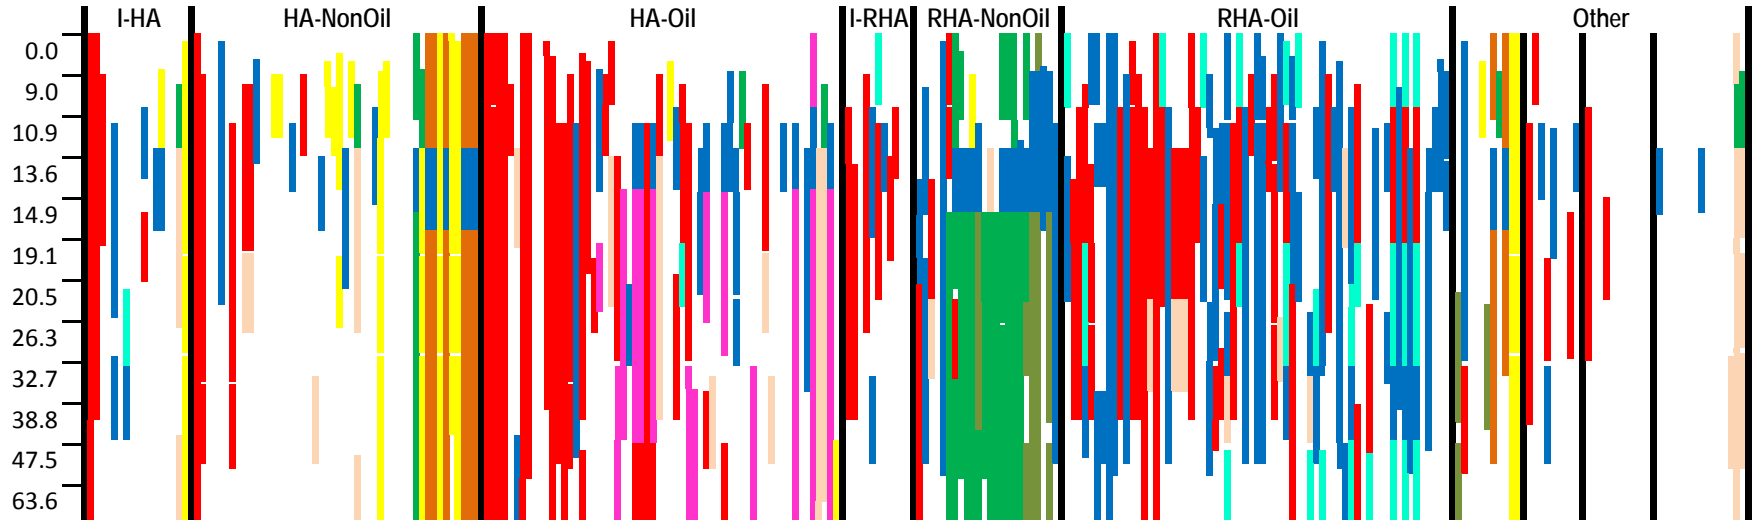

LG 8

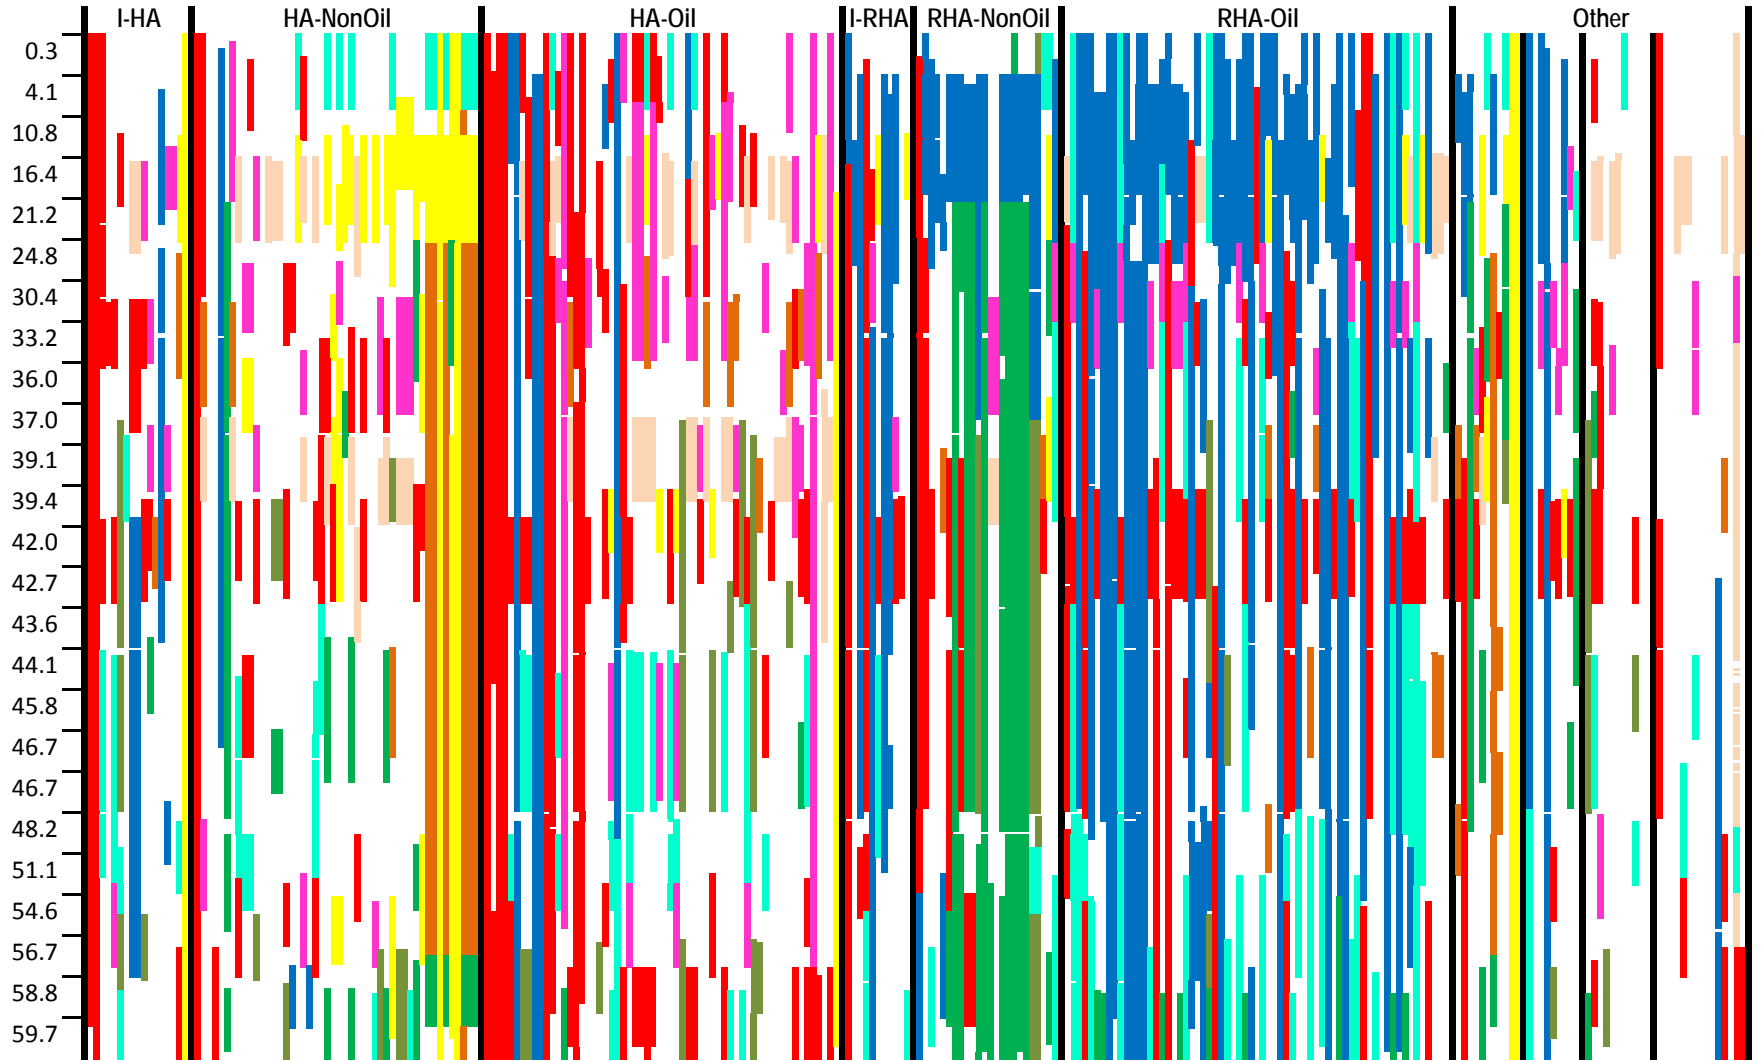



LG 9

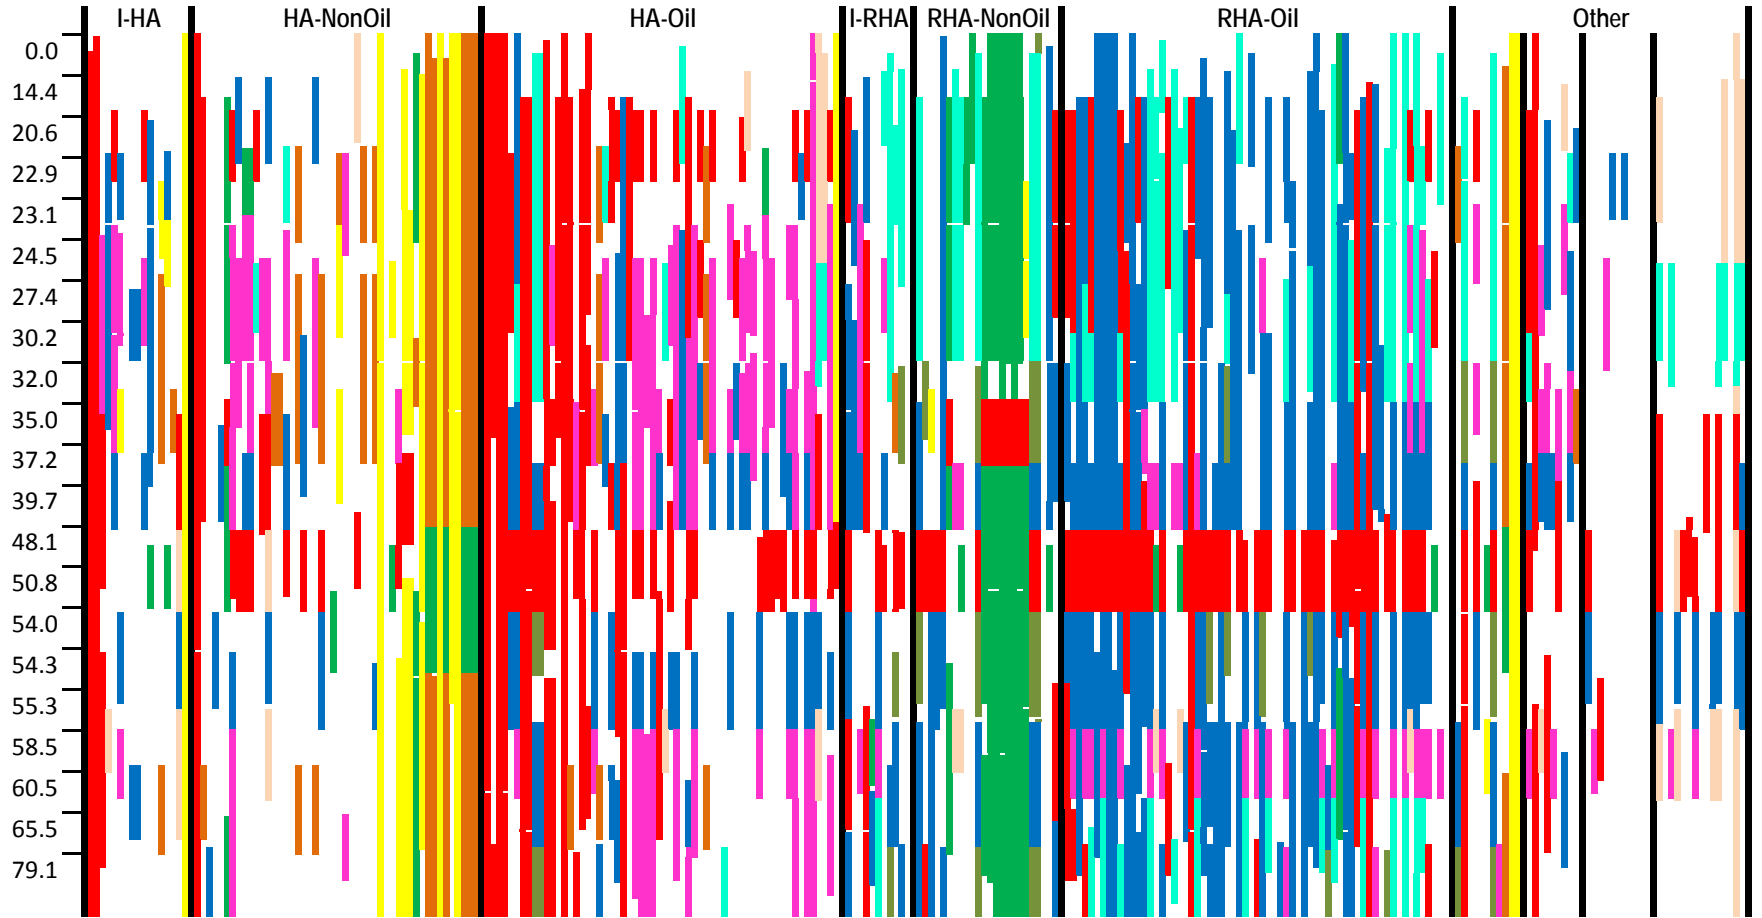

LG 10

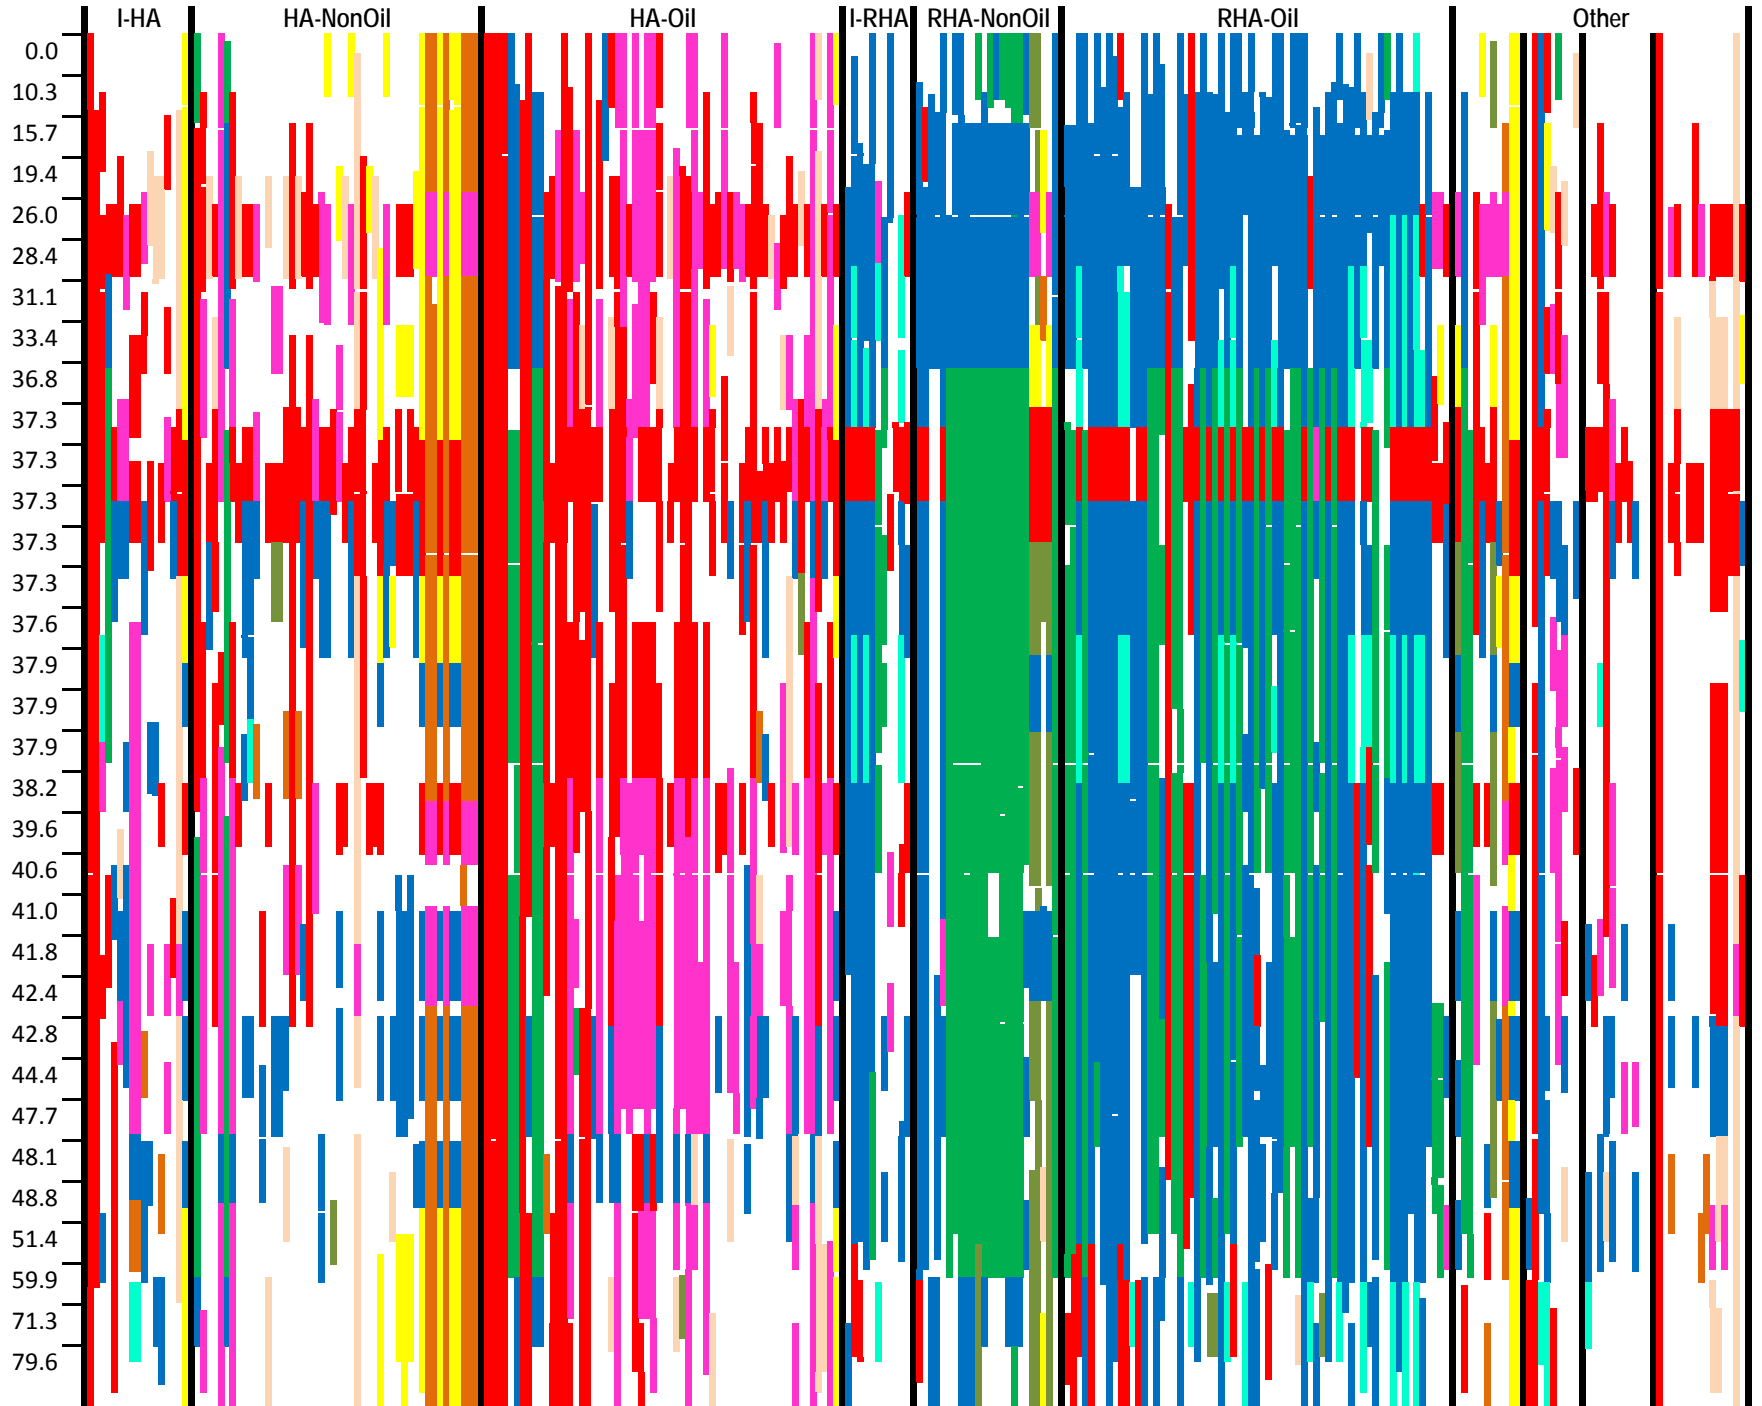

LG 11

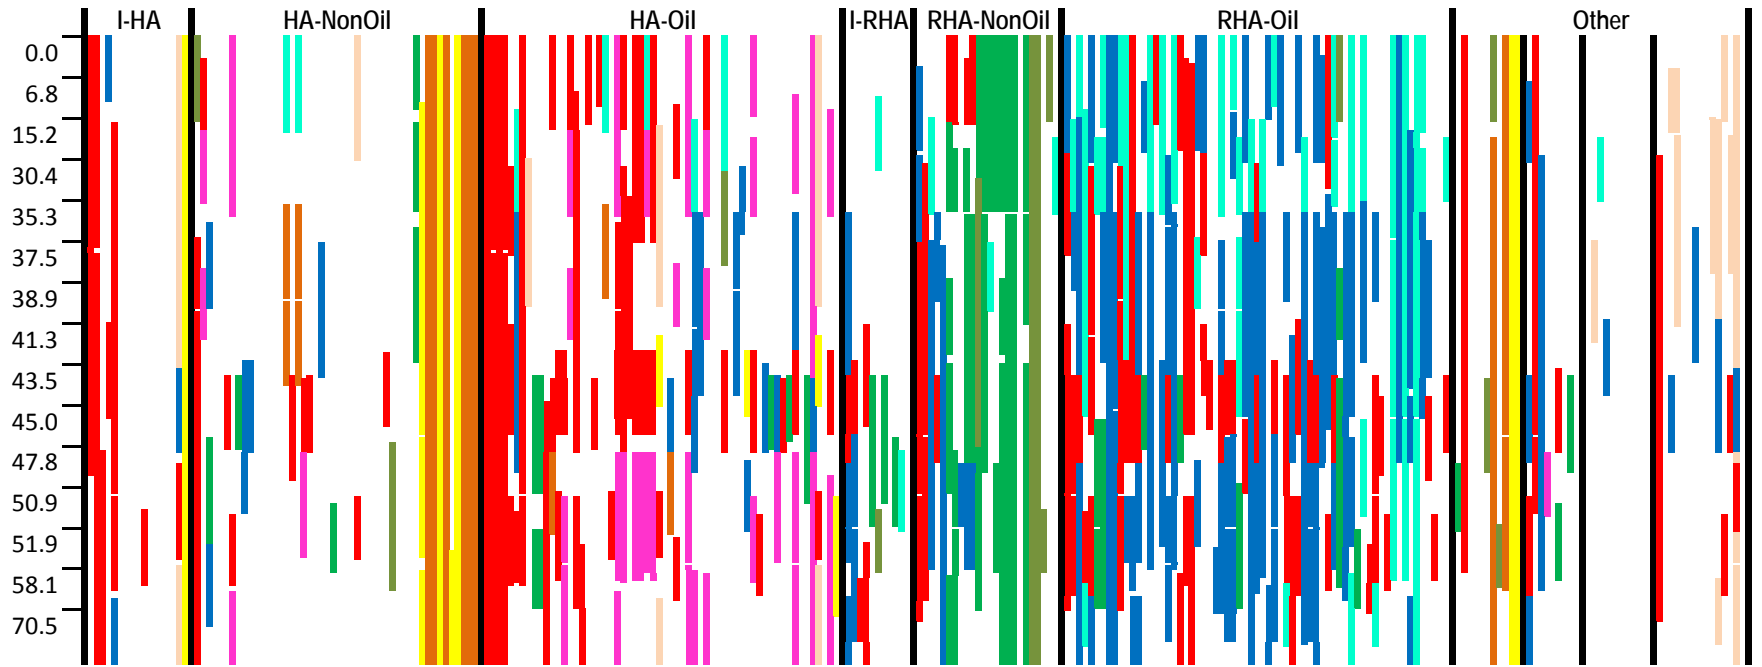

LG 12

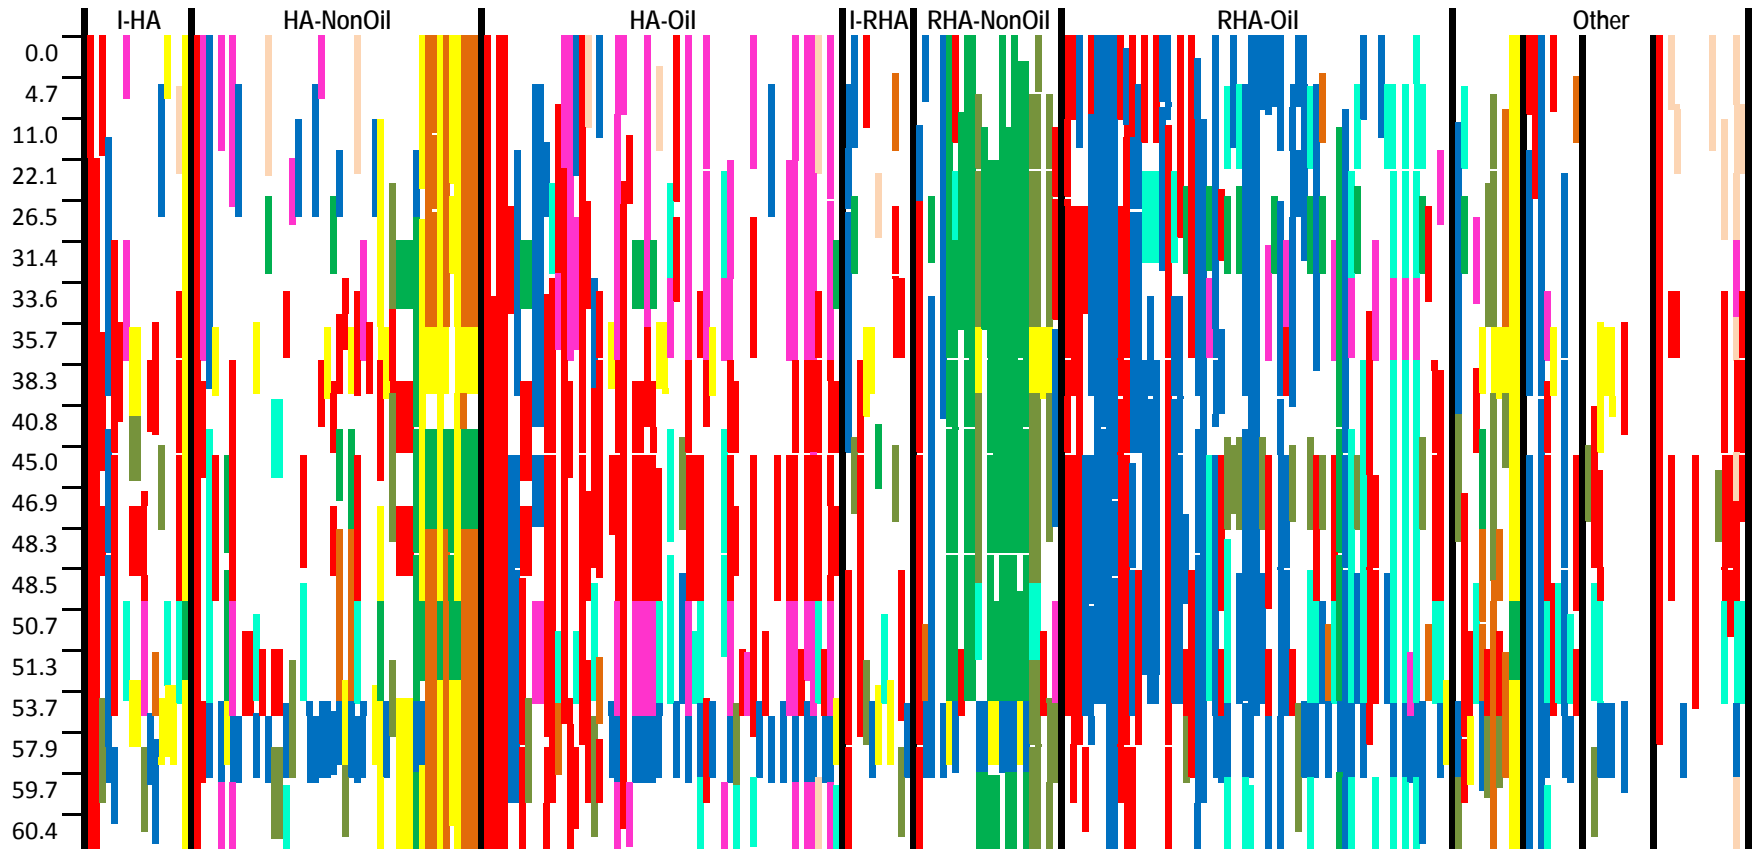

LG 13

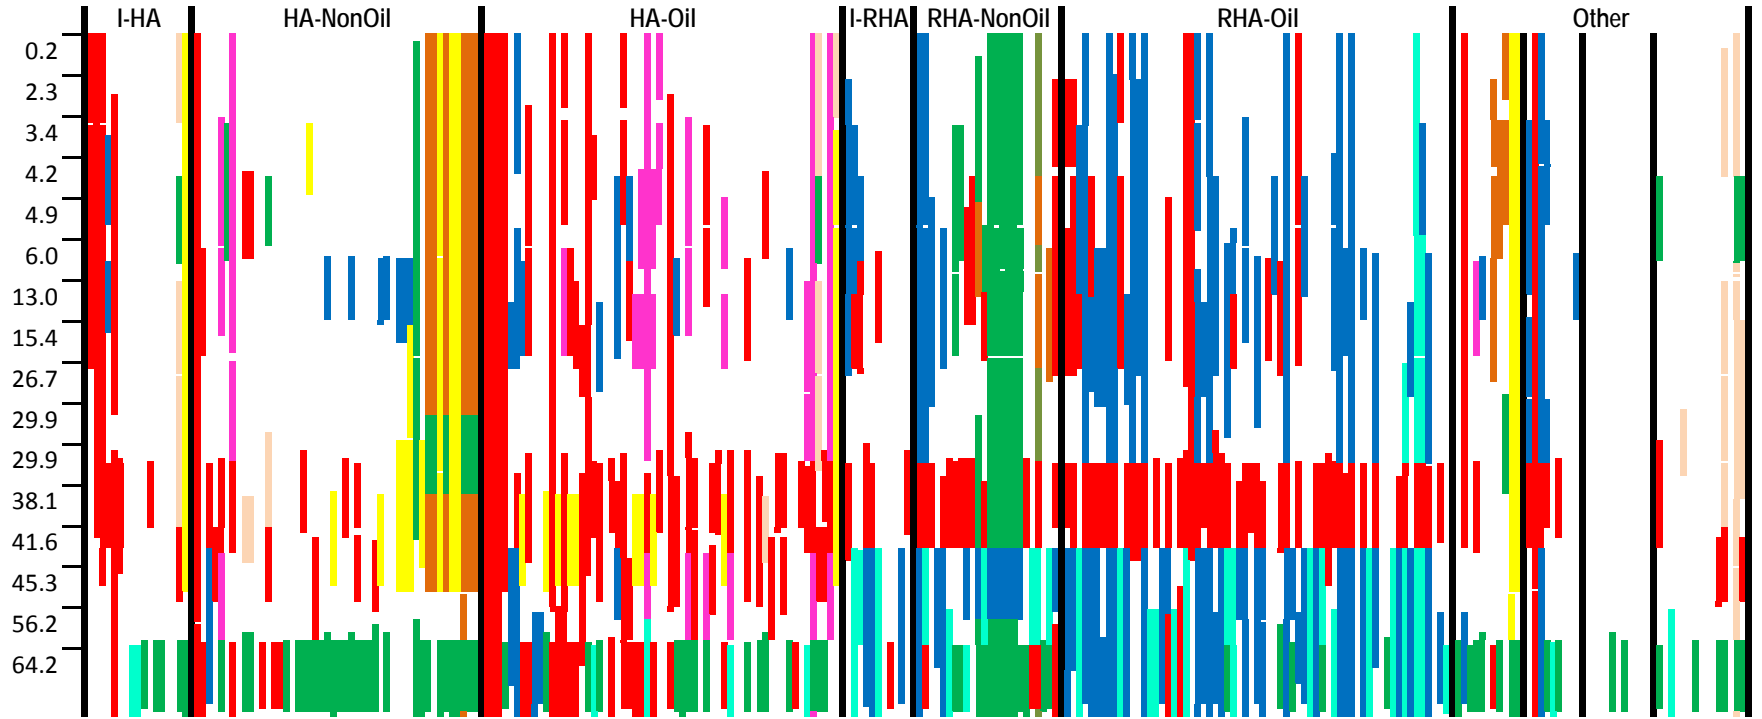

LG 14

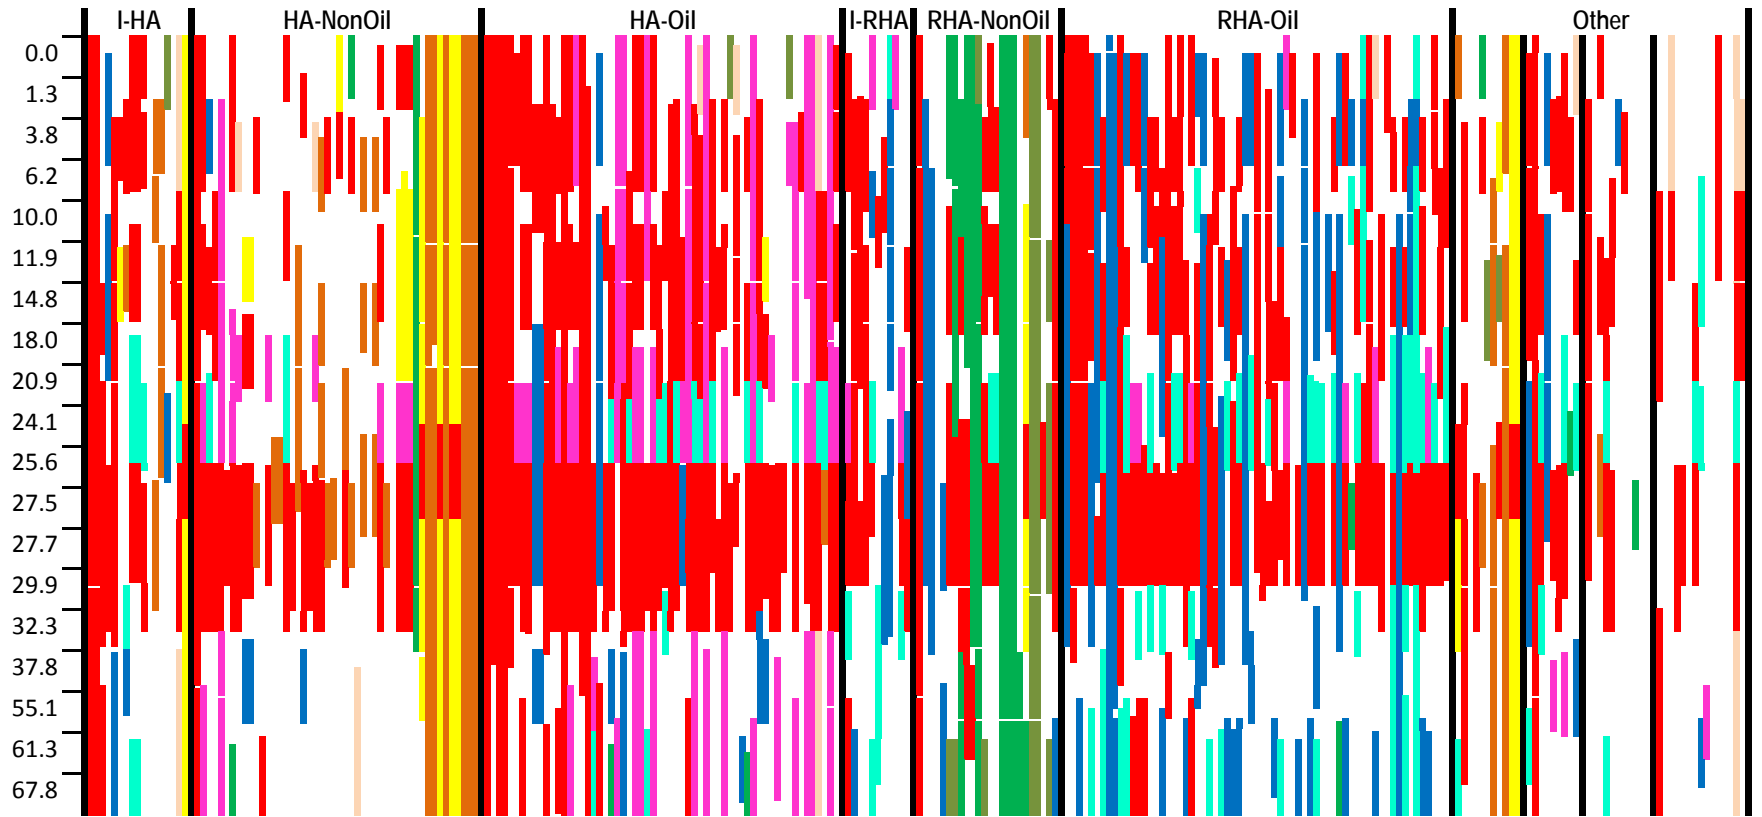

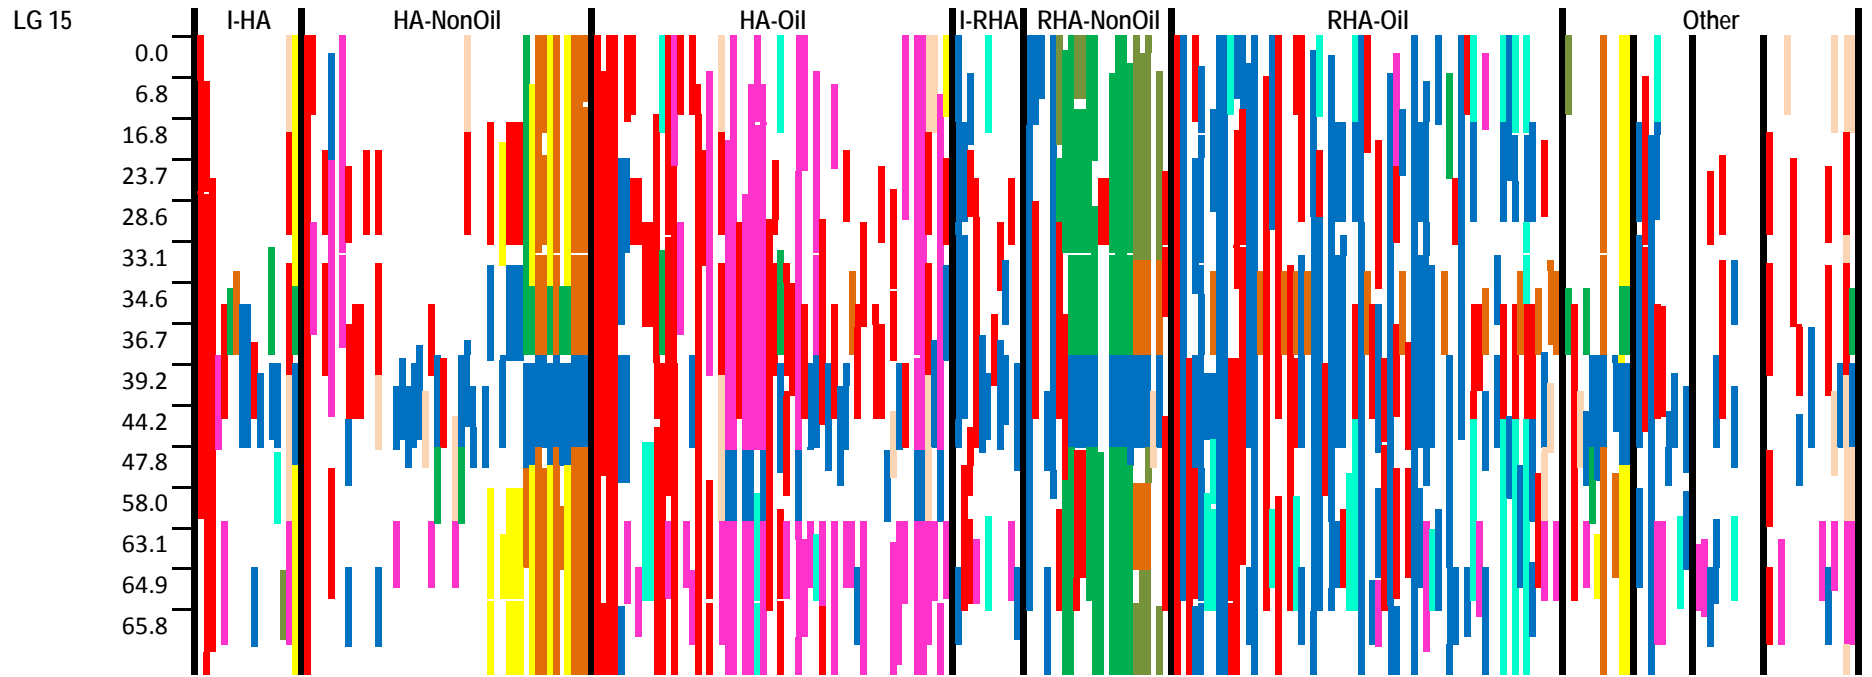

LG 16

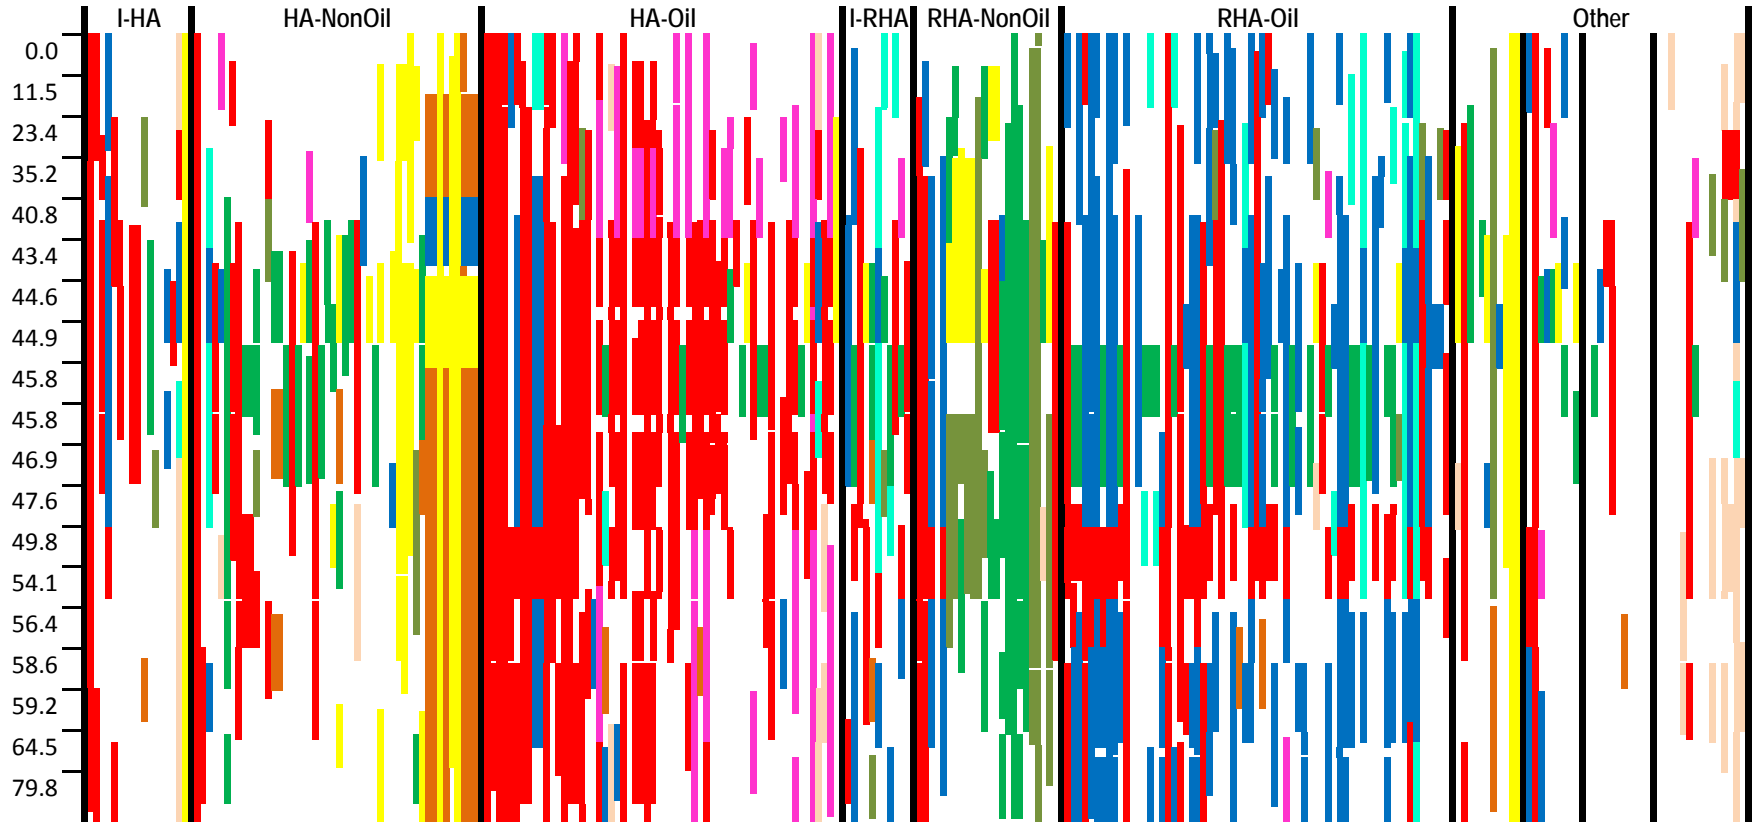



LG 17

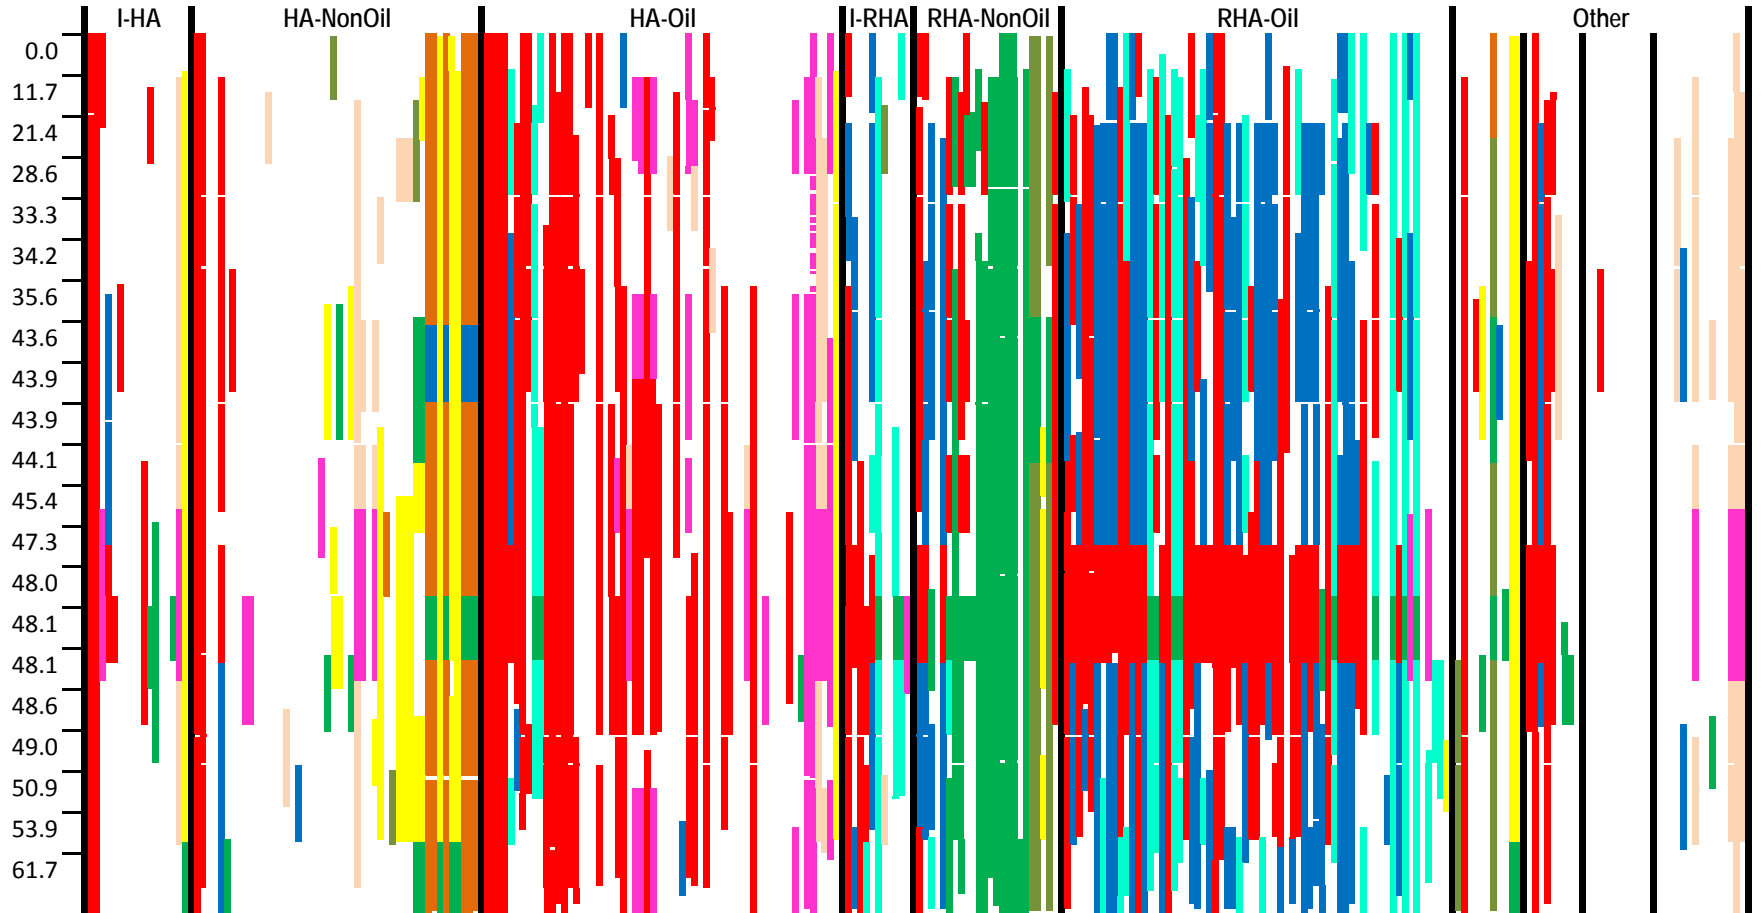

Supplement: pgen.1003378.s008.pdf [file pgen.1003378.s008.pdf]
