# Supplementary material for: Association Mapping and the Genomic Consequences of Selection in Sunflower
Source: PubMed Central journal article supplement (PMC3605098; doi:10.1371/journal.pgen.1003378), 2013-03-21

$$\text{DeltaK} = \text{mean}(|L''(K)|) / \text{sd}(L(K))$$

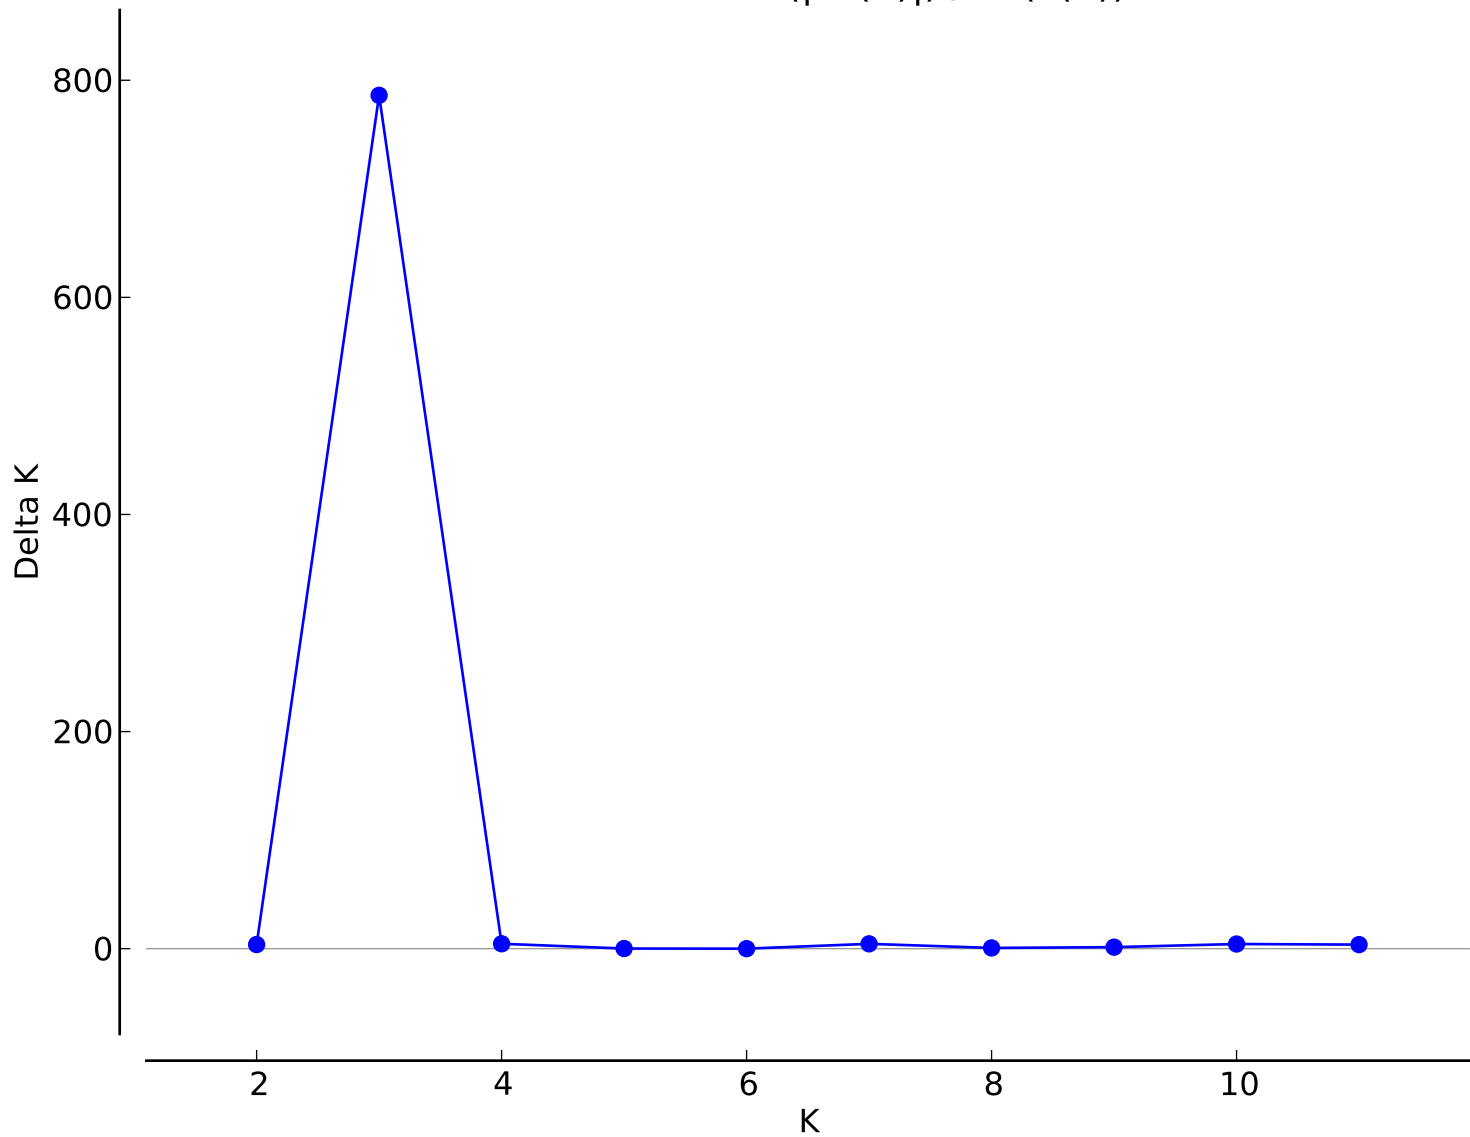

L(K) (mean  $\pm$  SD)

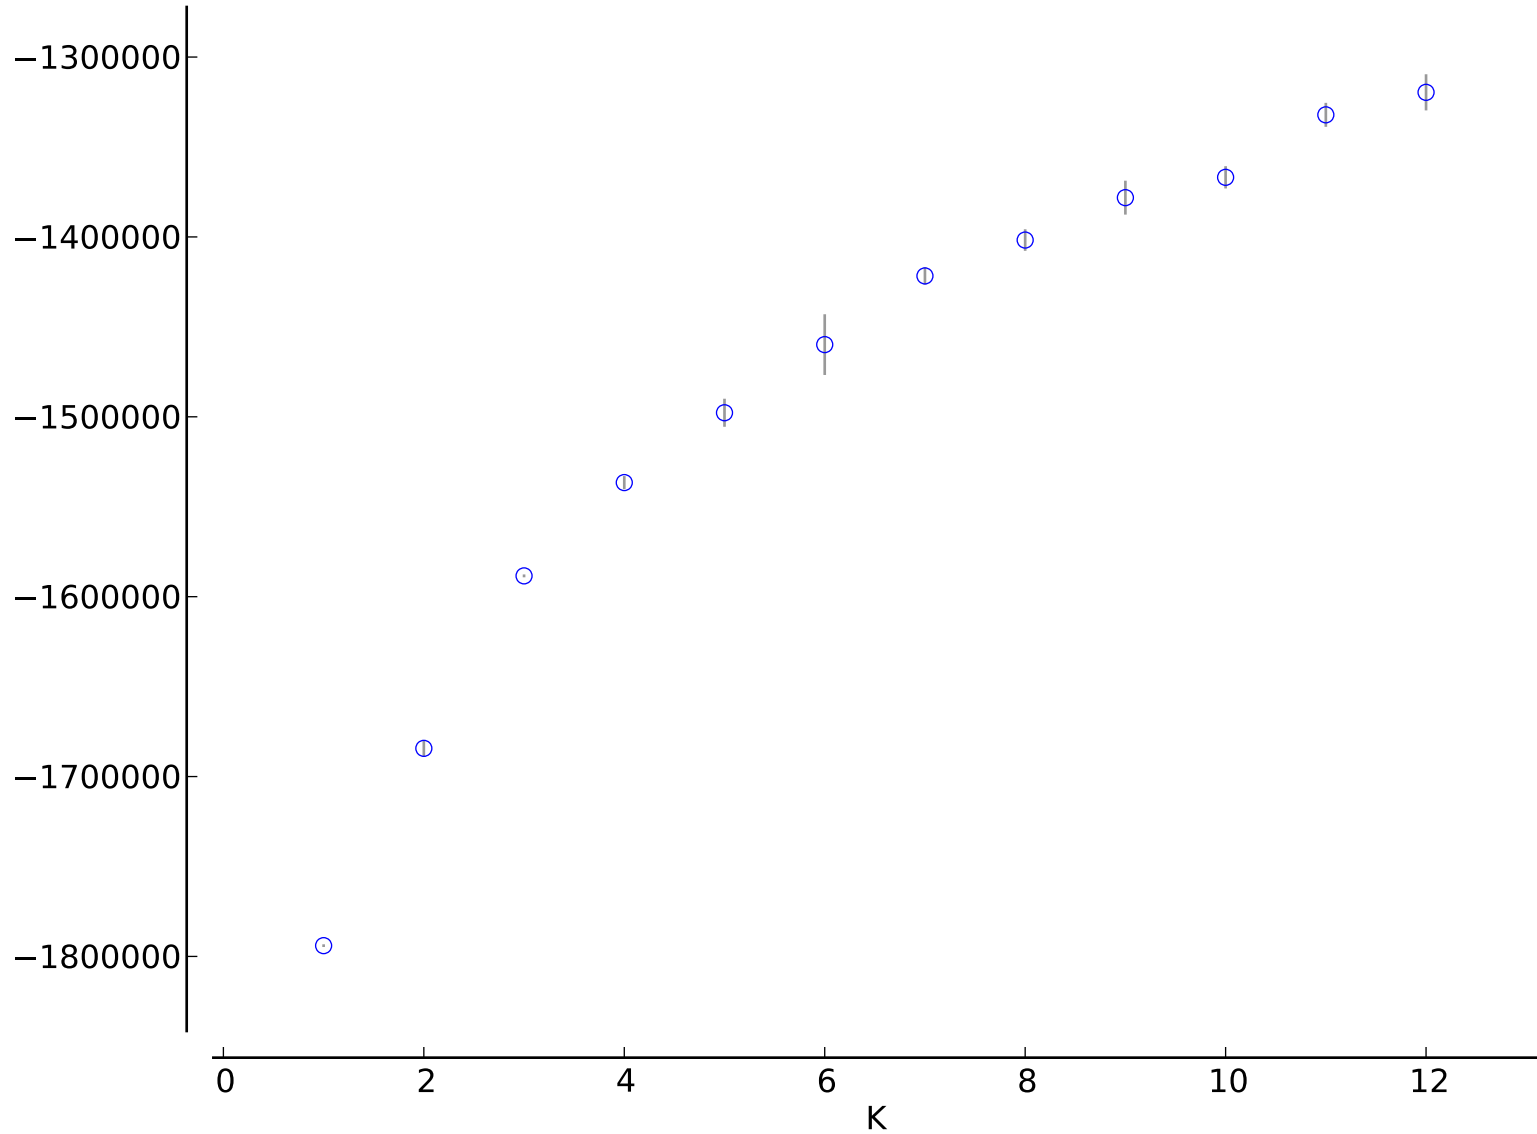

Supplement: pgen.1003378.s002.pdf [file pgen.1003378.s002.pdf]
