# Supplementary material for: Association Mapping and the Genomic Consequences of Selection in Sunflower
Source: PubMed Central journal article supplement (PMC3605098; doi:10.1371/journal.pgen.1003378), 2013-03-21

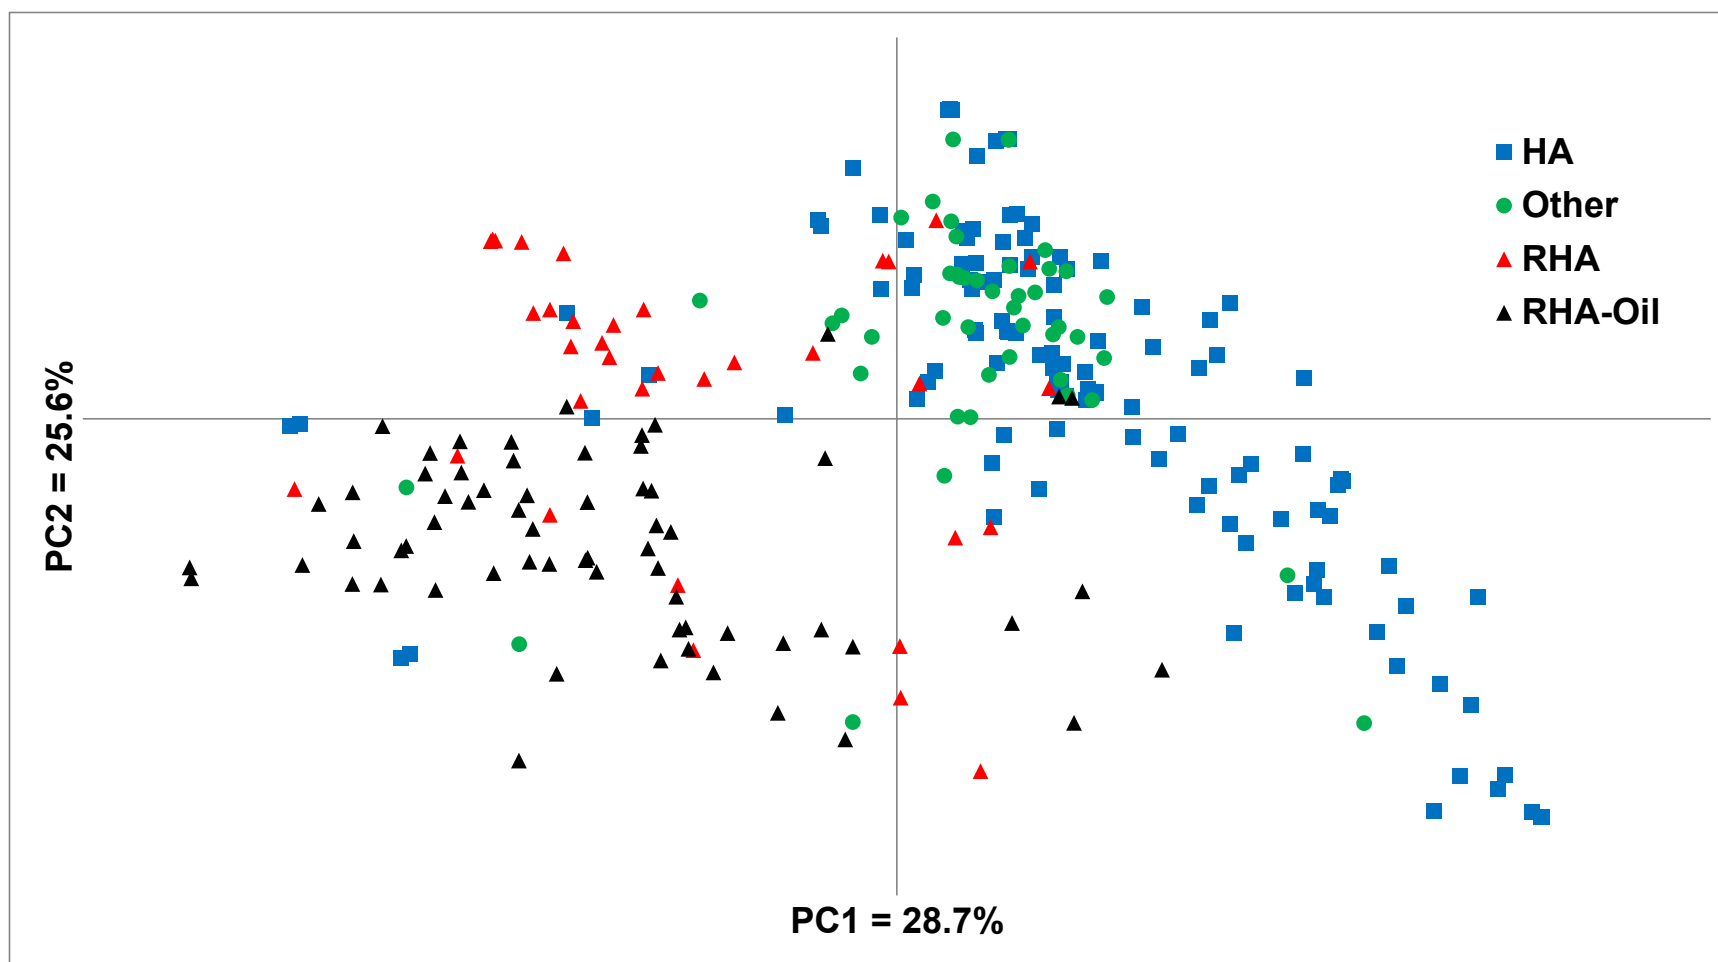

Supplement: pgen.1003378.s003.pdf [file pgen.1003378.s003.pdf]
