# Supplementary material for: Association Mapping and the Genomic Consequences of Selection in Sunflower
Source: PubMed Central journal article supplement (PMC3605098; doi:10.1371/journal.pgen.1003378), 2013-03-21
Supplement: pgen.1003378.s007.pdf [file pgen.1003378.s007.pdf]

|               | <b>GA DTF</b> | <b>IA DTF</b> | <b>BC DTF</b> | <b>GA Br</b> | <b>IA Br</b> | <b>BC Br</b> |
|---------------|---------------|---------------|---------------|--------------|--------------|--------------|
| <b>GA DTF</b> | -             |               |               |              |              |              |
| <b>IA DTF</b> | 0.66*         | -             |               |              |              |              |
| <b>BC DTF</b> | 0.58*         | 0.63*         | -             |              |              |              |
| <b>GA Br</b>  | -0.19*        | -0.13         | -0.030        | -            |              |              |
| <b>IA Br</b>  | -0.28*        | -0.19*        | -0.077        | 0.90*        | -            |              |
| <b>BC Br</b>  | -0.23*        | -0.17*        | -0.067        | 0.94*        | 0.91*        | -            |
